# Supplementary material for: Visible light-induced tandem oxidative cyclization of 2-alkynylanilines with disulfides (diselenides) to 3-sulfenyl- and 3-selenylindoles under transition metal-free and photocatalyst-free conditions
Source: Royal Society of Chemistry journal article supplement (doi:10.1039/c7qo00152e), 2017-01-01

## *Supporting Information*

### **Visible-light-induced a tandem oxidative cyclization of 2-alkynylanilines with disulfides(diselenides) to 3-sulfenyl- and 3-selenylindoles under transition-metal-free and photocatalyst-free conditions**

Qing Shi,<sup>a</sup> Pinhua Li,<sup>\*a</sup> Yan Zhang,<sup>a</sup> and Lei Wang<sup>\*a,b</sup>

<sup>a</sup> Department of Chemistry, Huaibei Normal University, Huaibei, Anhui 235000, P. R. China, Tel: +86-561-3802-069 Fax: +86-561-3090-518 E-mail: leiwang@chnu.edu.cn

<sup>b</sup>State Key Laboratory of Organometallic Chemistry, Shanghai Institute of Organic Chemistry, Chinese Academy of Sciences, Shanghai 200032, P. R. China

#### *Table of Contents for Supporting Information*

|                                                                        |   |
|------------------------------------------------------------------------|---|
| 1. Optimization of the reaction conditions.....                        | 2 |
| 2. Reaction mechanism study.....                                       | 3 |
| 3. <sup>1</sup> H and <sup>13</sup> C NMR spectra of the products..... | 5 |

## 1. Optimization of the reaction conditions<sup>a</sup> (Table S1)

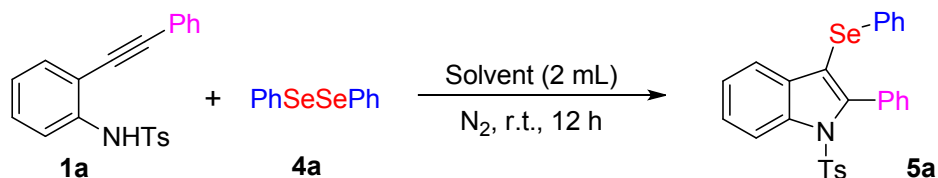

| Entry | Oxidant                       | Solvent            | Light Source | Yield <sup>b</sup> (%)                              |
|-------|-------------------------------|--------------------|--------------|-----------------------------------------------------|
| 1     | H <sub>2</sub> O <sub>2</sub> | PhCl               | Blue LED     | 72                                                  |
| 2     | H <sub>2</sub> O <sub>2</sub> | PhMe               | Blue LED     | 75                                                  |
| 3     | H <sub>2</sub> O <sub>2</sub> | Acetone            | Blue LED     | 28                                                  |
| 4     | H <sub>2</sub> O <sub>2</sub> | CH <sub>3</sub> CN | Blue LED     | 97                                                  |
| 5     | H <sub>2</sub> O <sub>2</sub> | DMC                | Blue LED     | 33                                                  |
| 6     | H <sub>2</sub> O <sub>2</sub> | DCE                | Blue LED     | 54                                                  |
| 7     | H <sub>2</sub> O <sub>2</sub> | MeOH               | Blue LED     | n.r.                                                |
| 8     | H <sub>2</sub> O <sub>2</sub> | EtOH               | Blue LED     | n.r.                                                |
| 9     | H <sub>2</sub> O <sub>2</sub> | DMF                | Blue LED     | n.r.                                                |
| 10    | H <sub>2</sub> O <sub>2</sub> | DMSO               | Blue LED     | n.r.                                                |
| 11    | H <sub>2</sub> O <sub>2</sub> | 1,4-Dioxane        | Blue LED     | n.r.                                                |
| 12    | H <sub>2</sub> O <sub>2</sub> | CH <sub>3</sub> CN | Blue LED     | 69 <sup>c</sup> , 88 <sup>d</sup>                   |
| 13    | H <sub>2</sub> O <sub>2</sub> | CH <sub>3</sub> CN | Blue LED     | 73 <sup>e</sup> , 98 <sup>f</sup>                   |
| 14    | H <sub>2</sub> O <sub>2</sub> | CH <sub>3</sub> CN | Blue LED     | 68 <sup>g</sup> , 83 <sup>h</sup> , 97 <sup>i</sup> |

<sup>a</sup> Reaction conditions: **1a** (0.20 mmol), **4a** (0.125 mmol), H<sub>2</sub>O<sub>2</sub> (1.0 equiv, 30% aqueous solution), solvent (2.0 mL), nitrogen atmosphere at room temperature under 3 W LED irradiation for 12 h. <sup>b</sup> isolated yield of the product based on compound **1a**; <sup>c</sup> H<sub>2</sub>O<sub>2</sub> (0.50 equiv, 30% aqueous solution) was used. <sup>d</sup> H<sub>2</sub>O<sub>2</sub> (1.5 equiv, 30% aqueous solution) was added. <sup>e</sup> **4a** (0.10 mmol) was used. <sup>f</sup> **4a** (0.15 mmol) was added. <sup>g</sup> 6 h. <sup>h</sup> 9 h. <sup>i</sup> 15 h.

## 2. Reaction mechanism study

### 2.1 Free radical-trapping experiment (I)

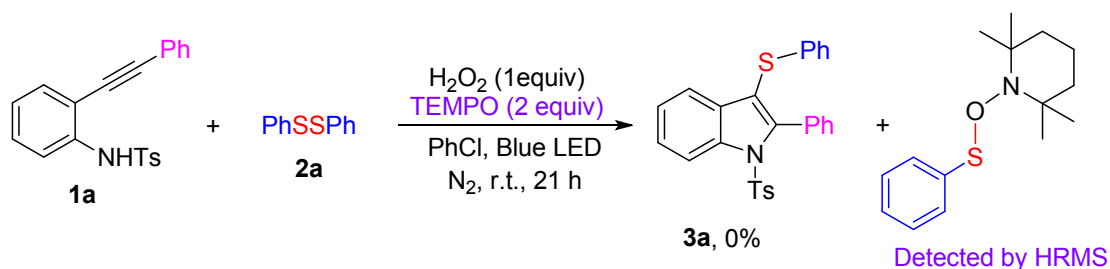

4-Methyl-*N*-(2-(phenylethynyl)phenyl)benzenesulfonamide (**1a**, 0.20 mmol), diphenyl disulfide (**2a**, 0.125 mmol),  $\text{H}_2\text{O}_2$  (1.0 equiv, 30% aqueous solution) and chlorobenzene (2.0 mL) and (2,2,6,6-tetramethylpiperidine)-1-oxyl (TEMPO, 0.40 mmol, 2.0 equiv) was added to an oven-dried Schlenk tube equipped with magnetic stirring bar, and the reaction tube was irradiated using 3 W blue LED at room temperature under  $\text{N}_2$  atmosphere for 21 h. After the reaction was completed, no desired product **3a** was obtained, and a free radical-trapping adduct of  $\text{PhS}^\bullet$  with TEMPO was observed by HPLC-HRMS analysis of the reaction solution (Figure S1).

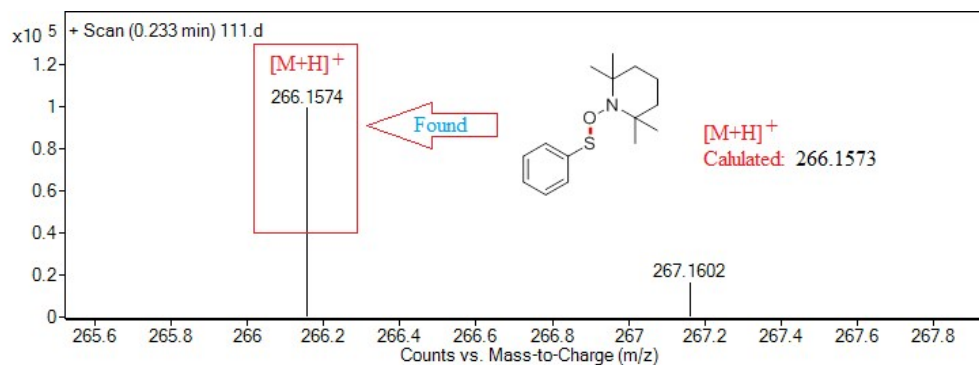

**Figure S1.** HRMS analysis of the adduct of  $\text{PhS}^\bullet$  with TEMPO

## 2.2 Free radical-trapping experiment (II)

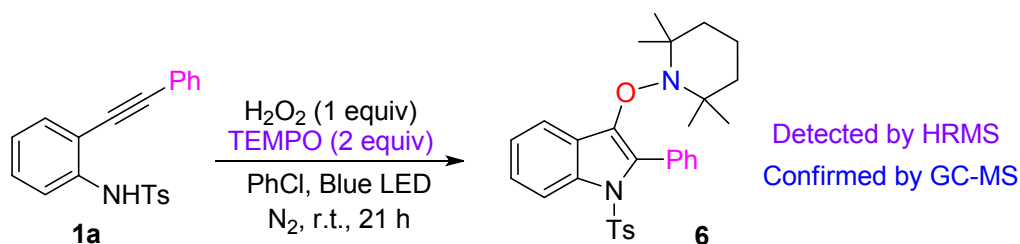

4-Methyl-*N*-(2-(phenylethynyl)phenyl)benzenesulfonamide (**1a**, 0.20 mmol), H<sub>2</sub>O<sub>2</sub> (1.0 equiv, 30% aqueous solution) and chlorobenzene (2.0 mL) and (2,2,6,6-tetramethylpiperidine)-1-oxyl (TEMPO, 0.40 mmol, 2.0 equiv) was added to an oven-dried Schlenk tube equipped with magnetic stirring bar, and the reaction tube was irradiated using 3 W blue LED at room temperature under N<sub>2</sub> atmosphere for 21 h. After the reaction was completed, a free radical-trapping adduct (**6**) of indole radical with TEMPO, which was confirmed by HPLC-HRMS and GC-MS analysis of the reaction solution (Figure S2 and S3).

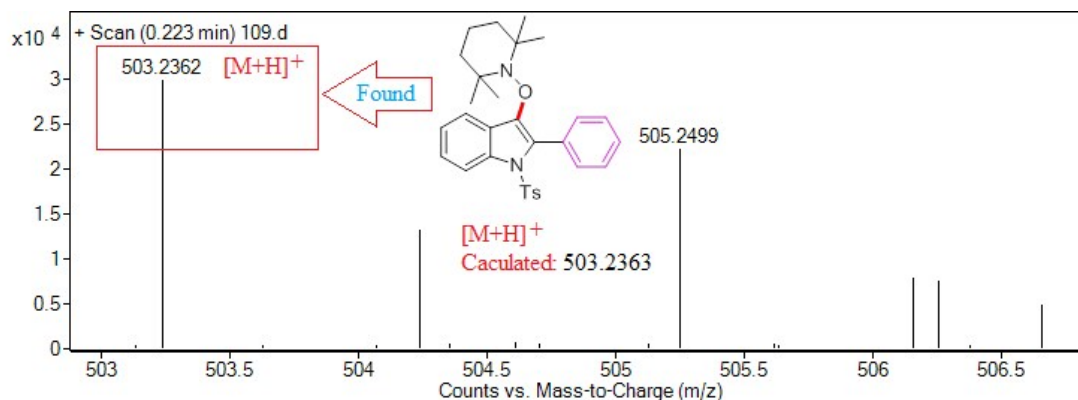

**Figure S2.** HRMS analysis of the adduct of adduct (**6**) of indole radical with TEMPO

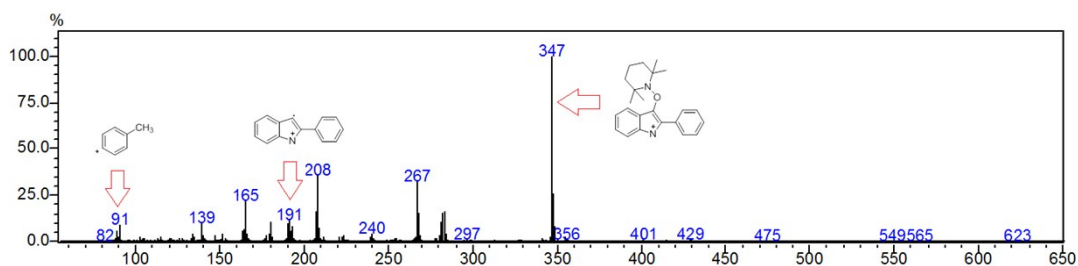

**Figure S3.** GC-MS analysis of the adduct of adduct (**6**) of indole radical with TEMPO

### 3. $^1\text{H}$ and $^{13}\text{C}$ NMR spectra of the products

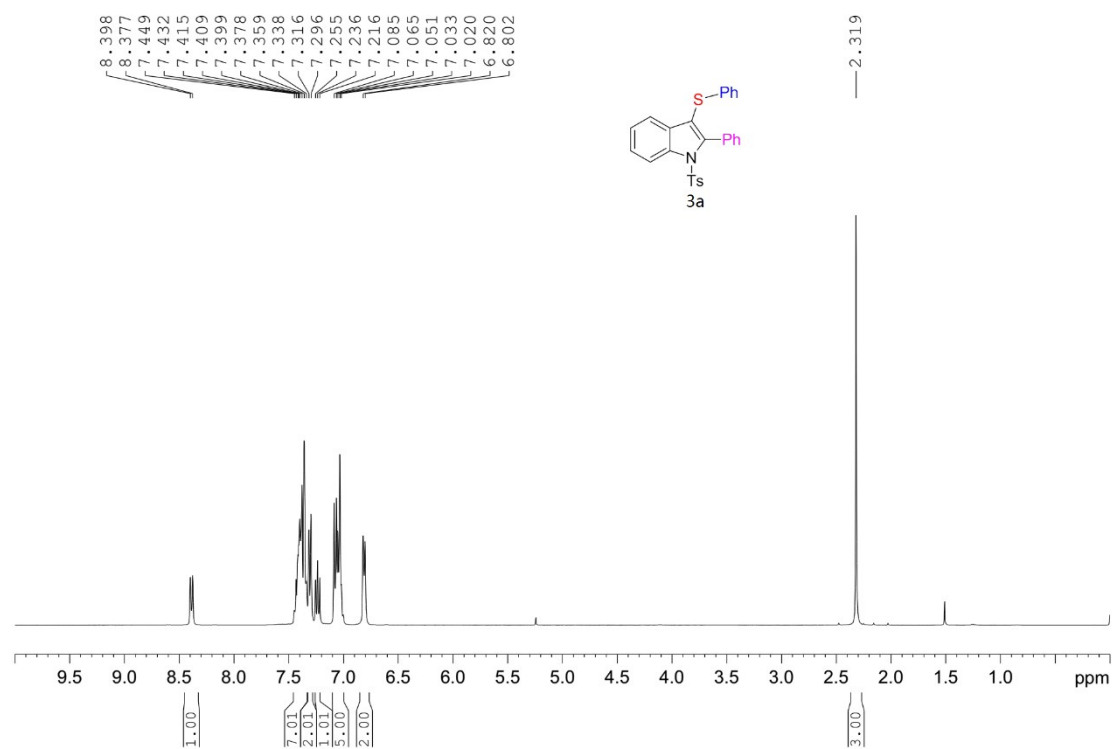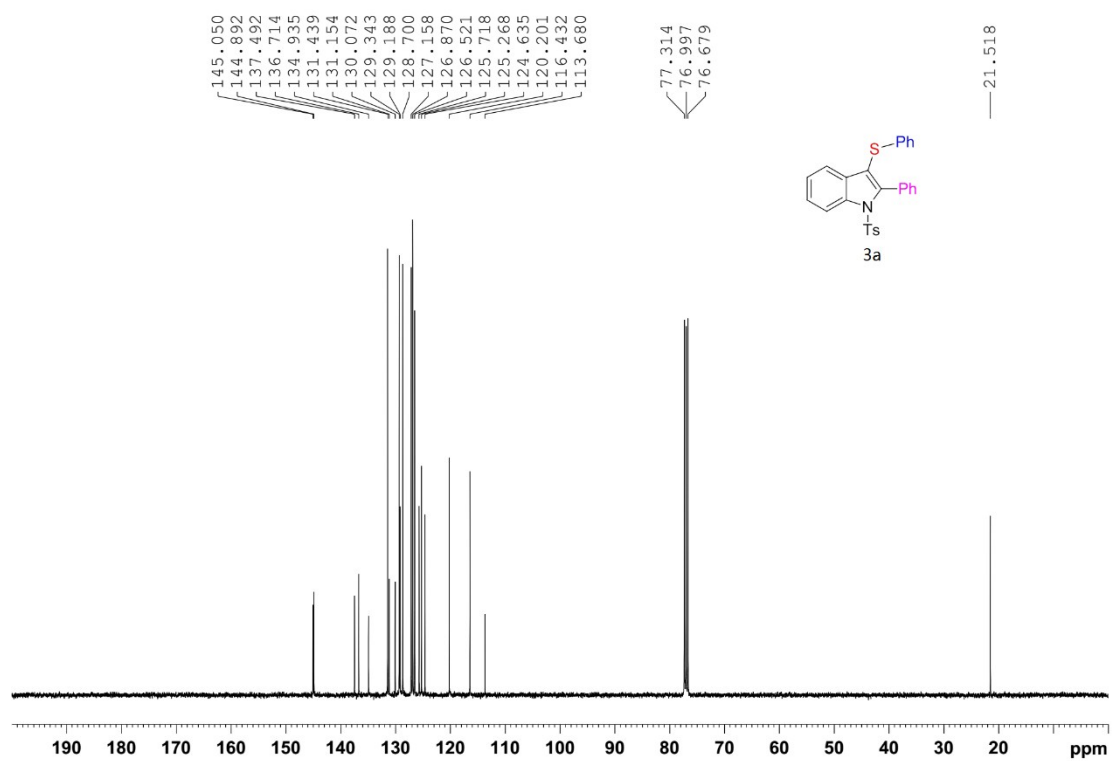

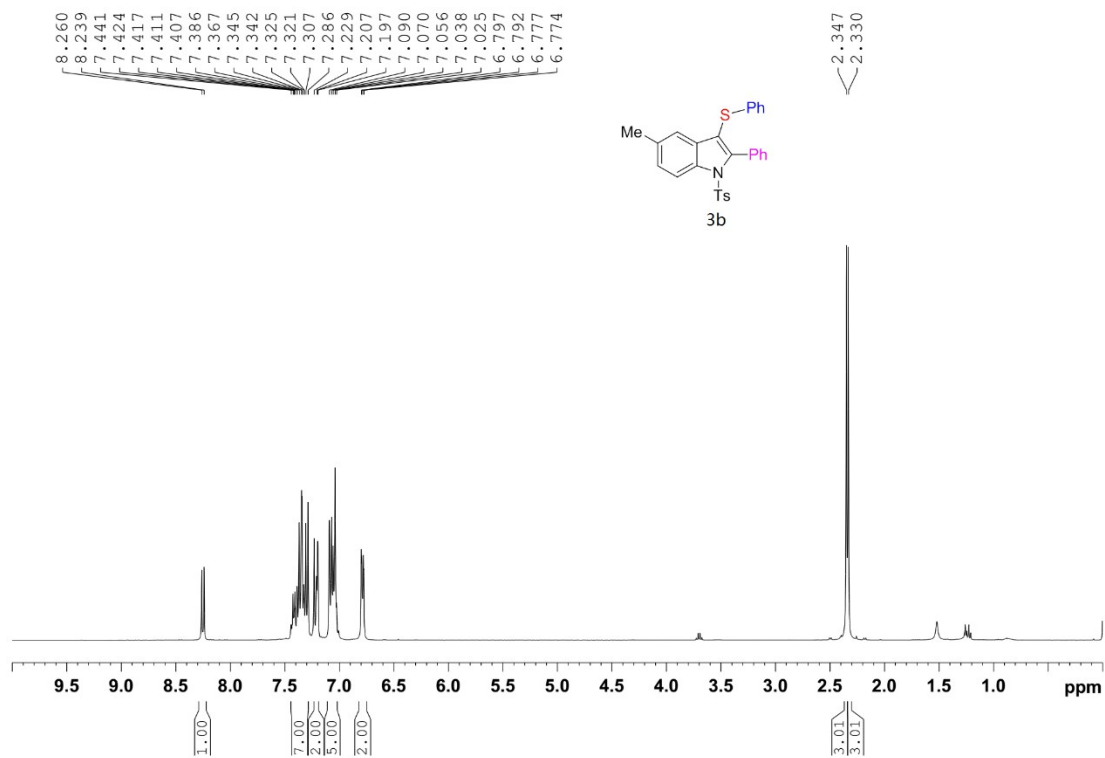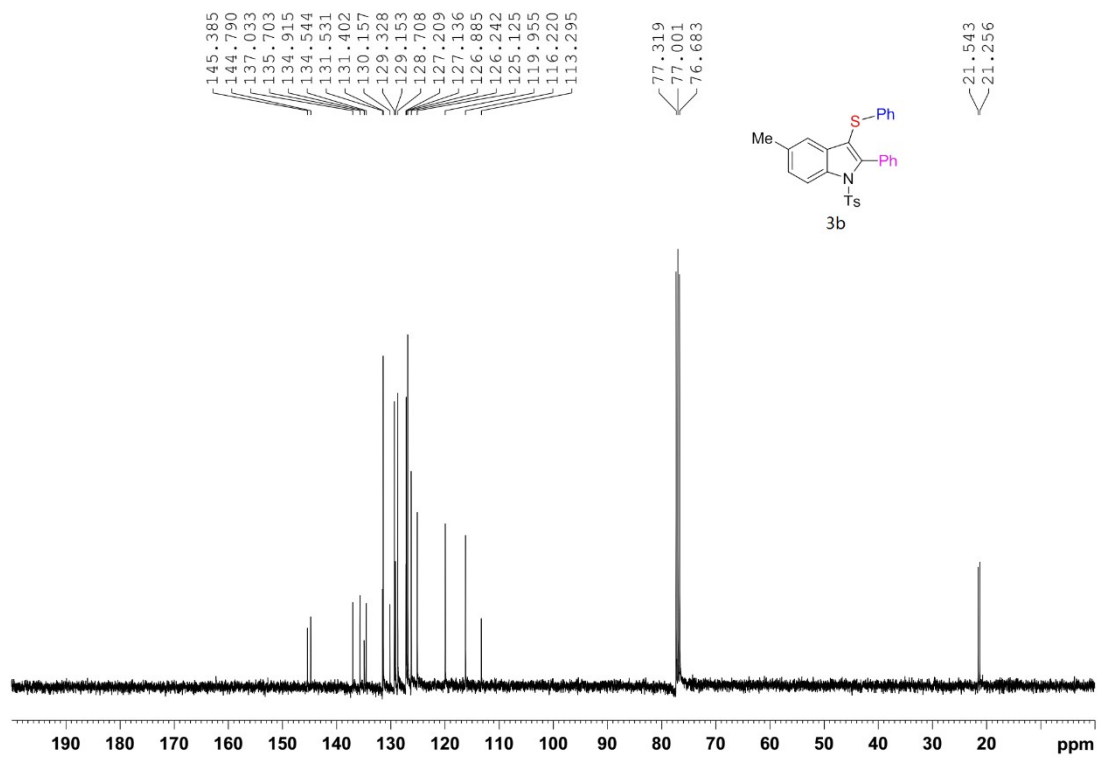

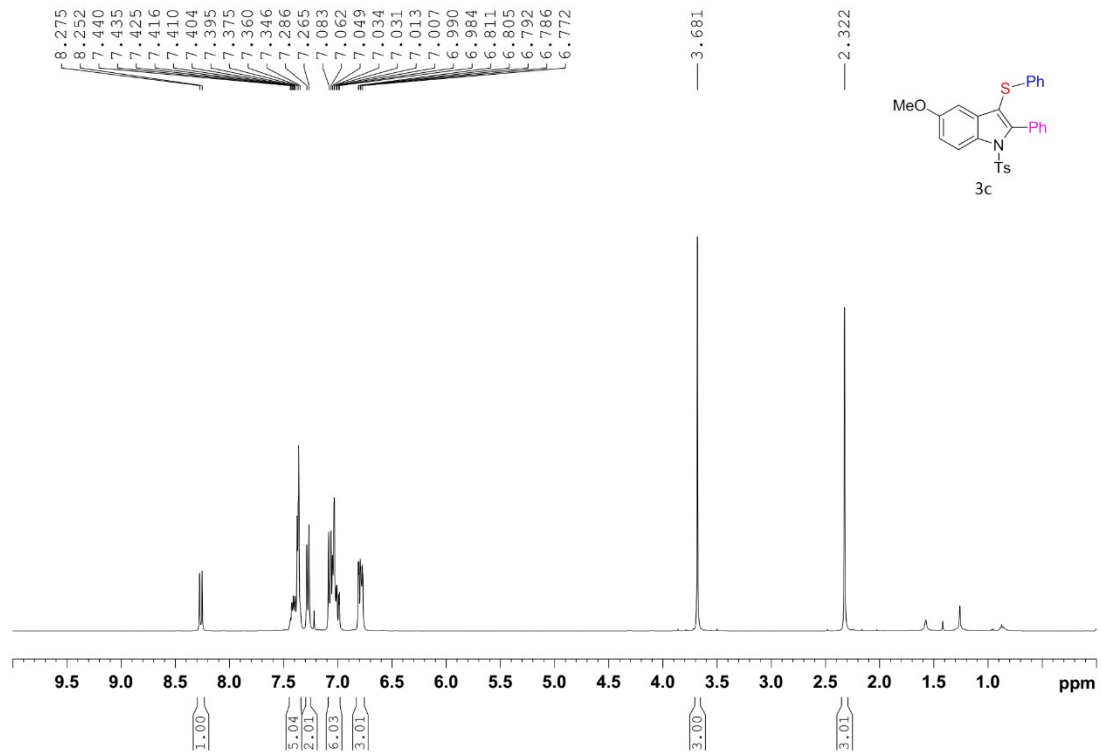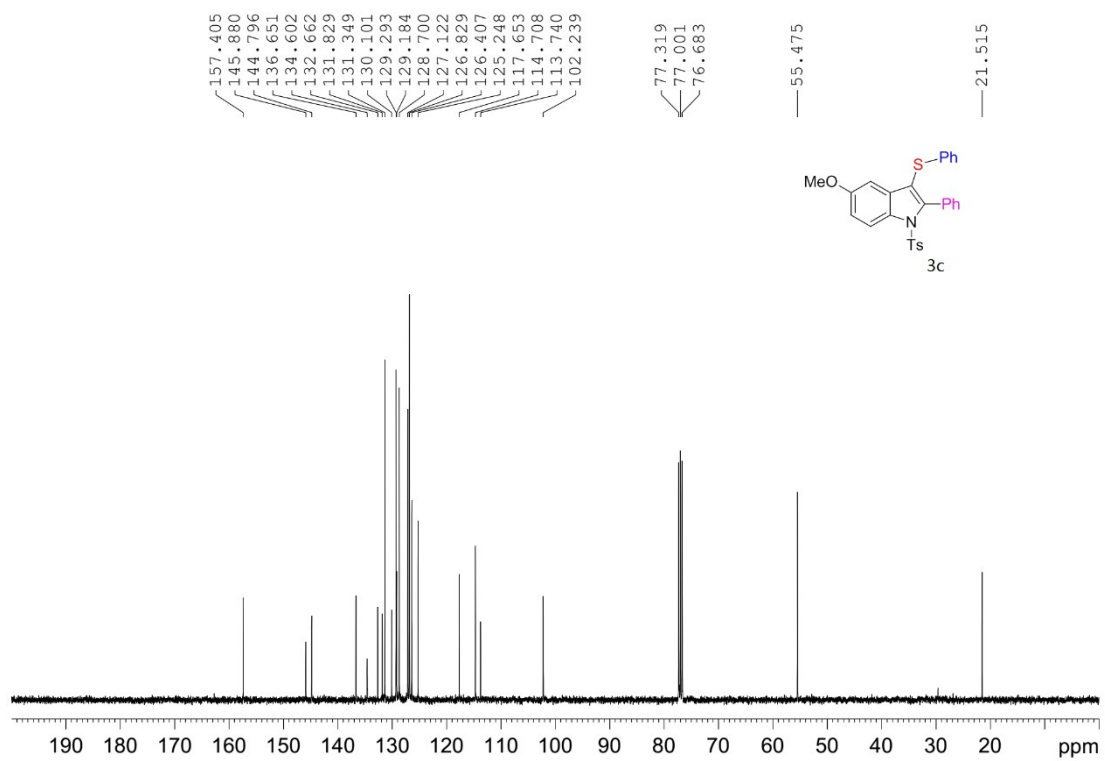

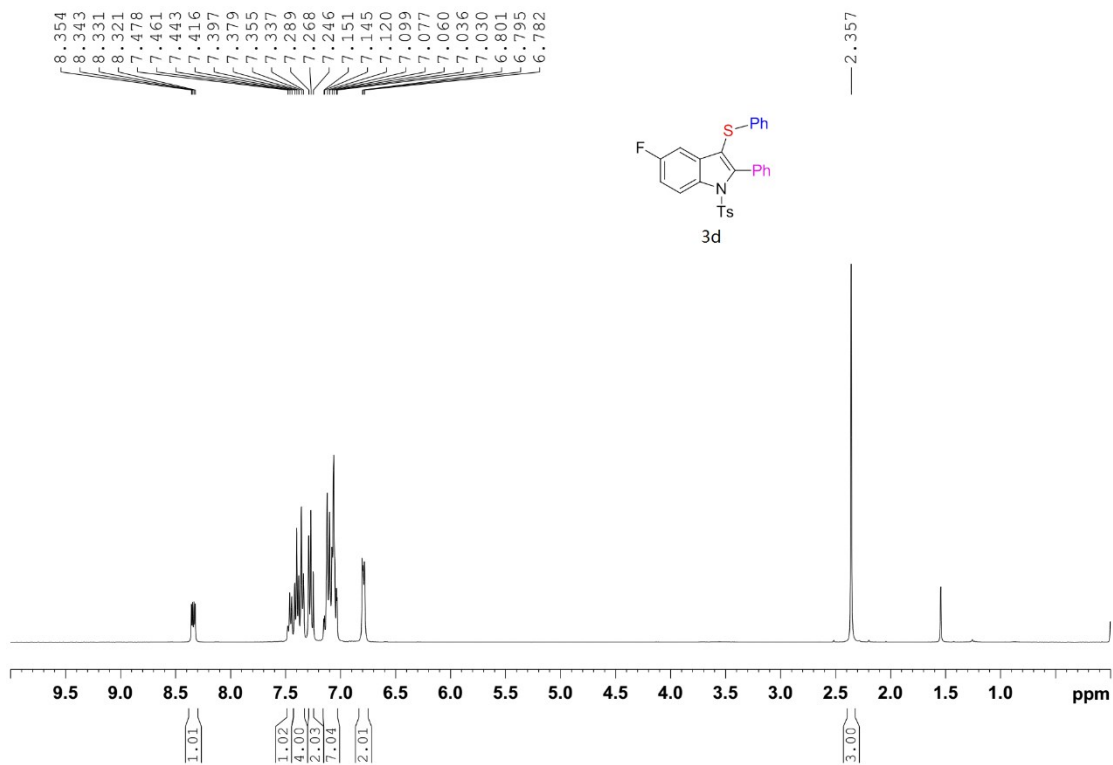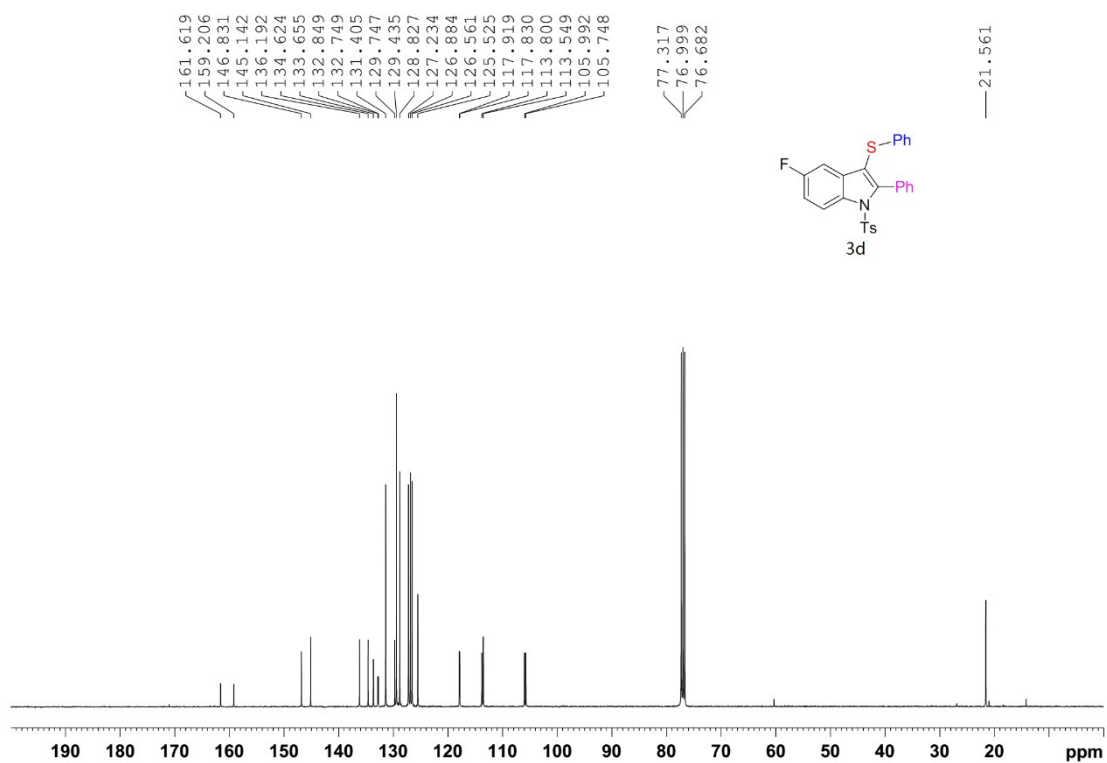



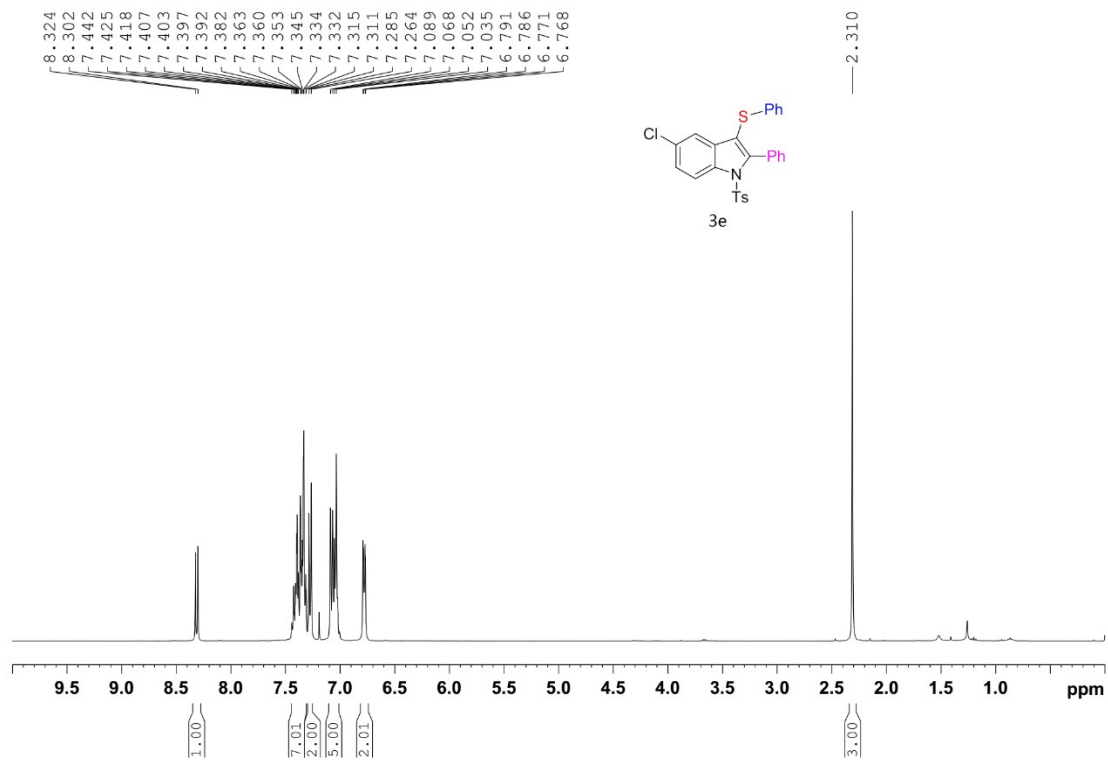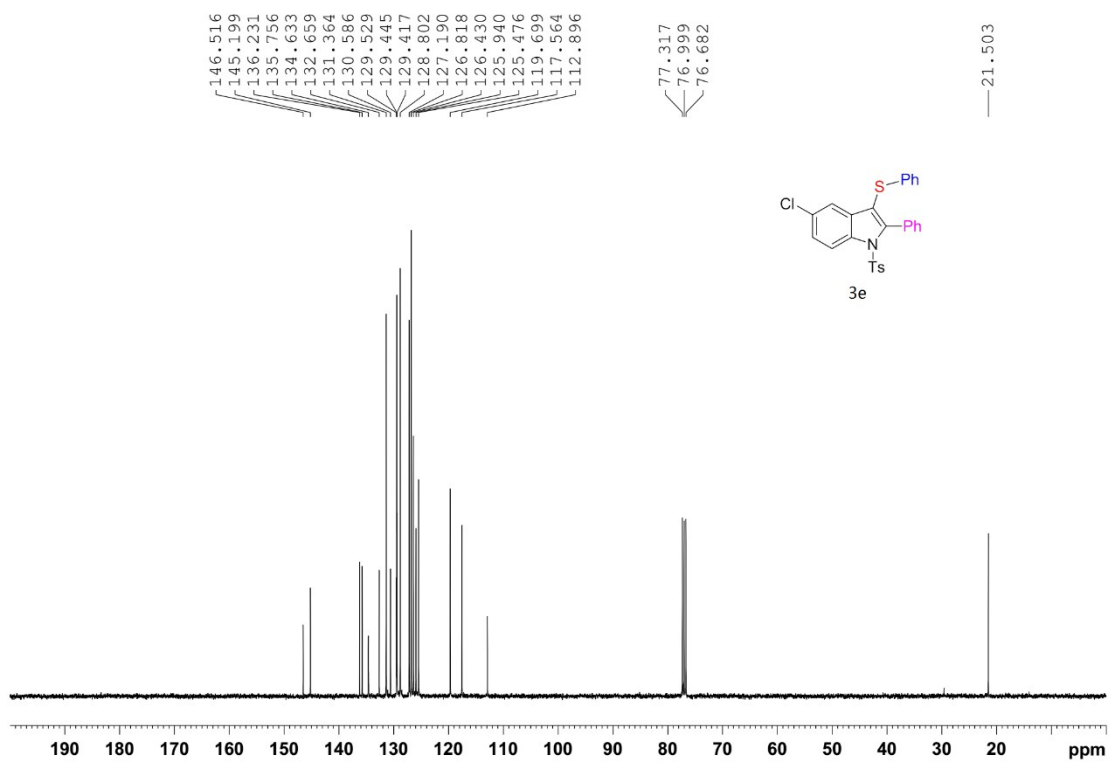

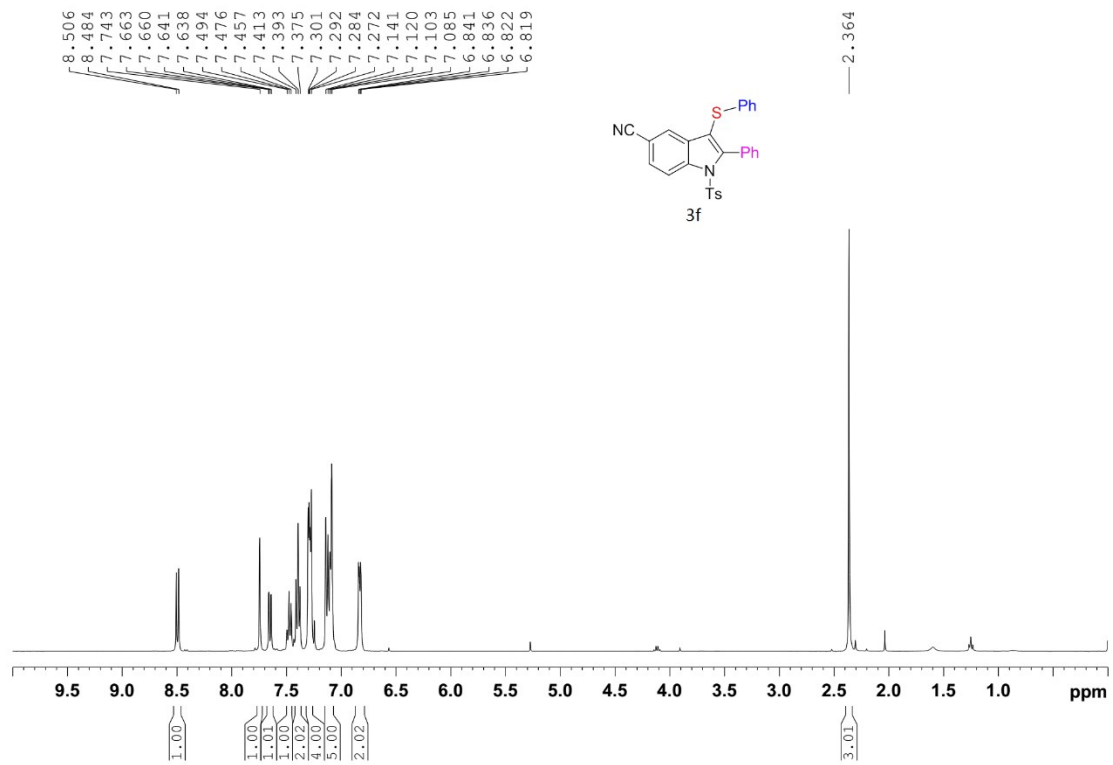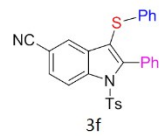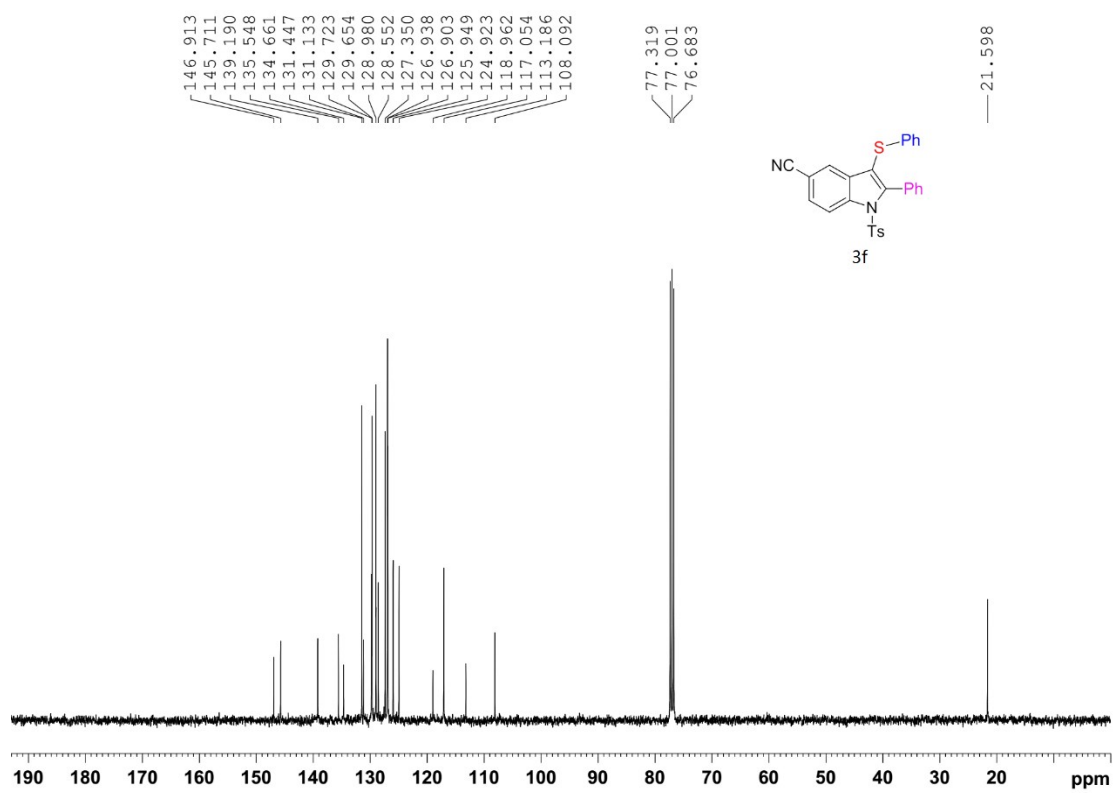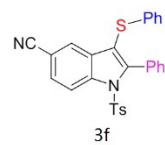

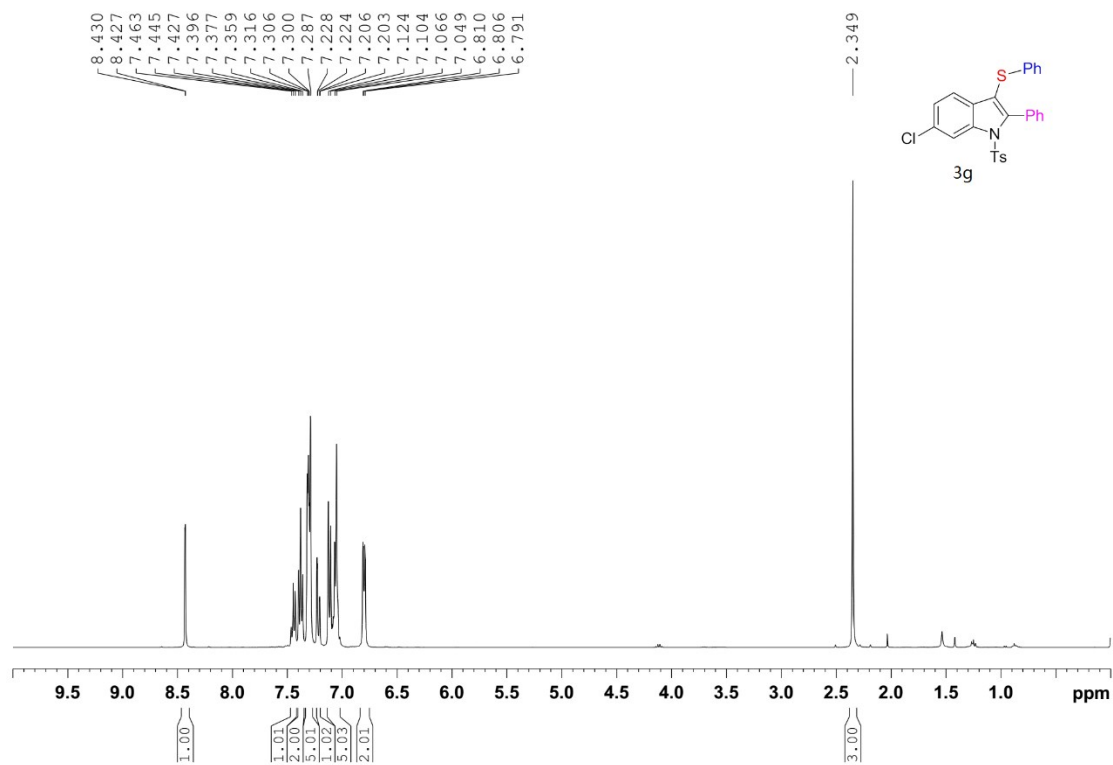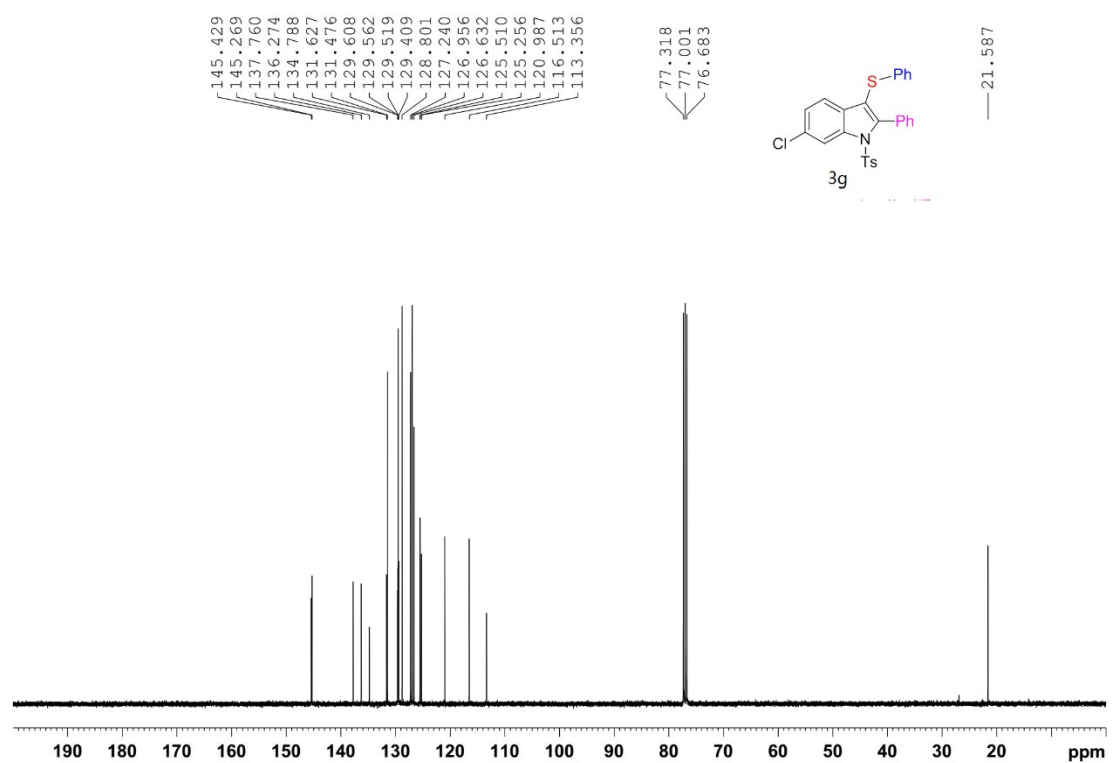

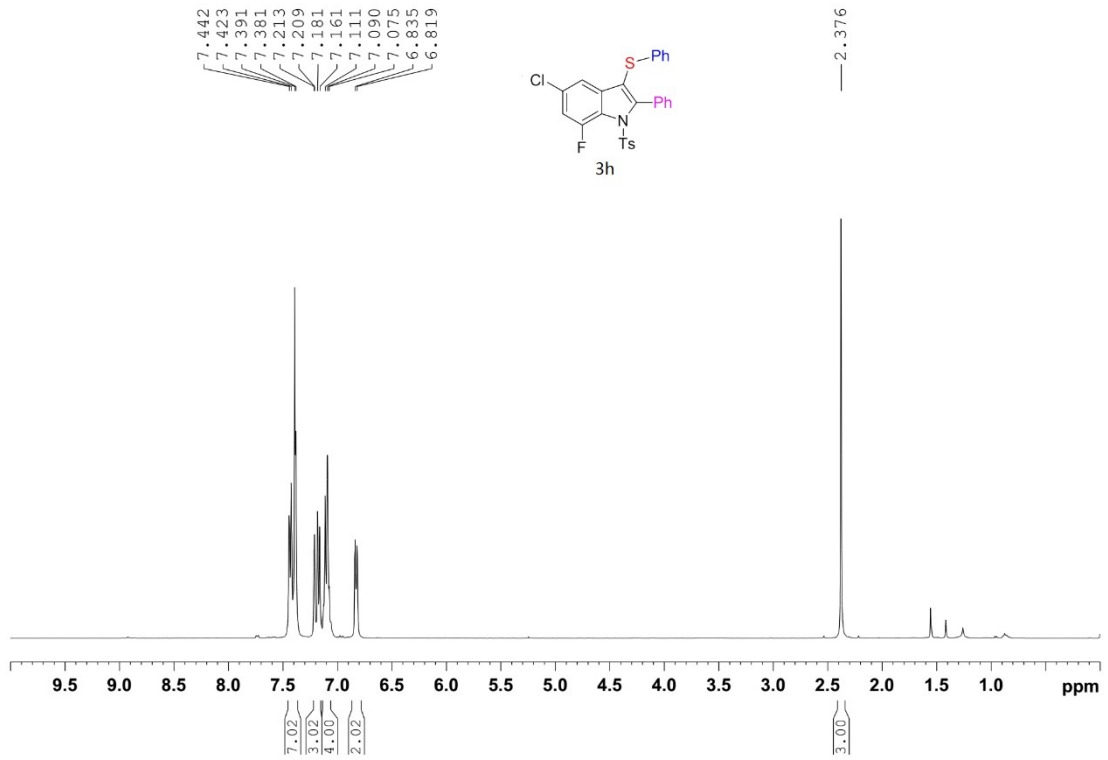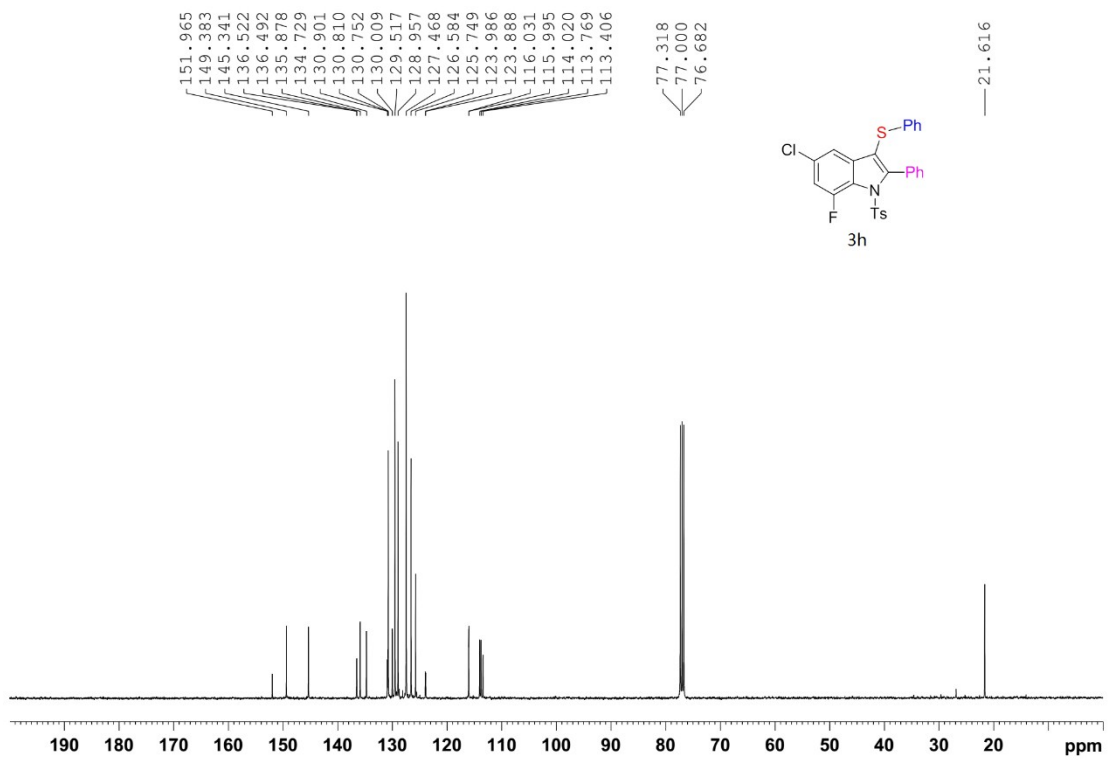

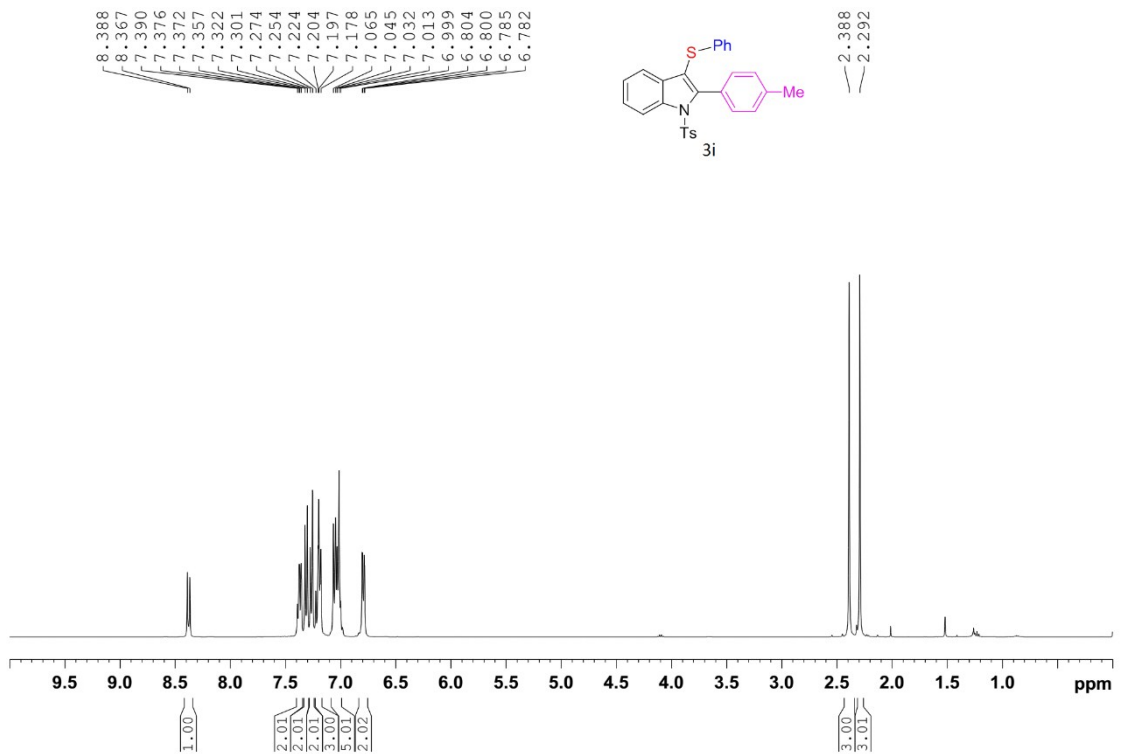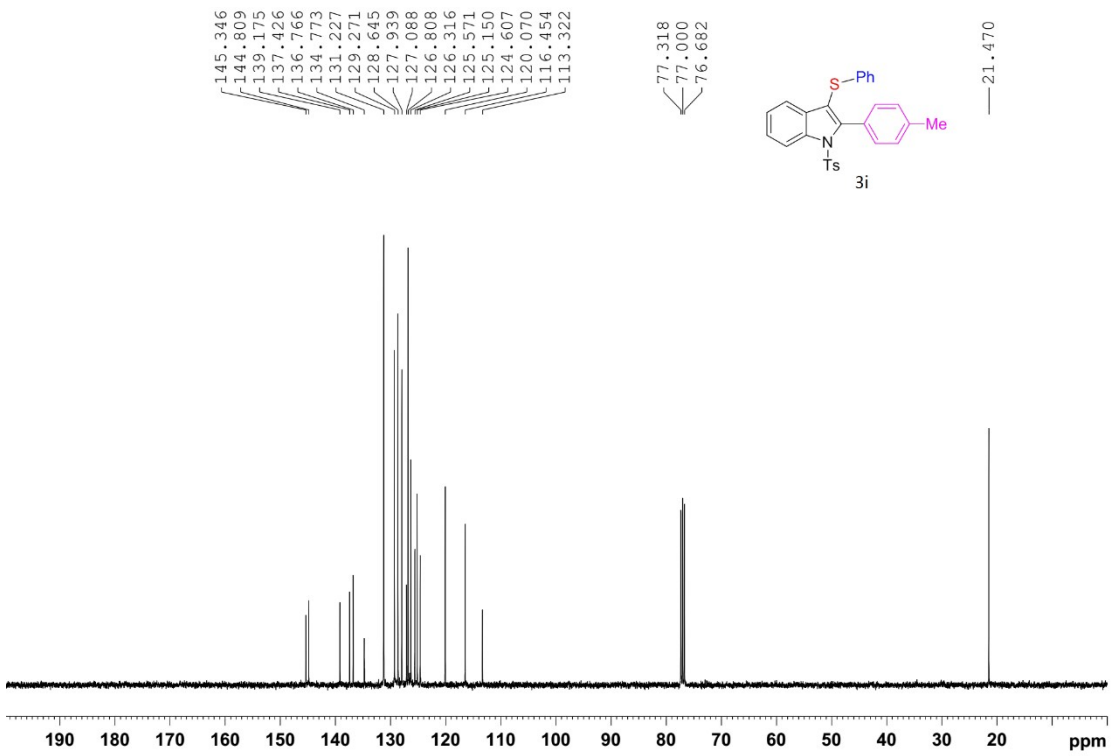

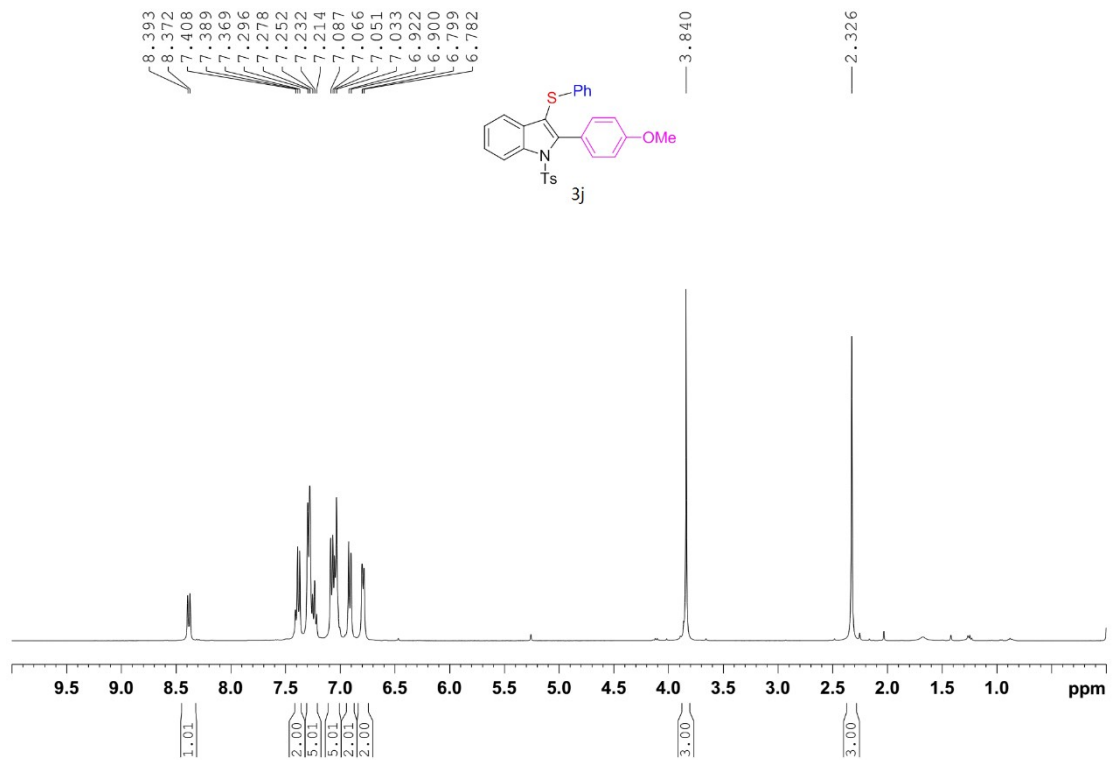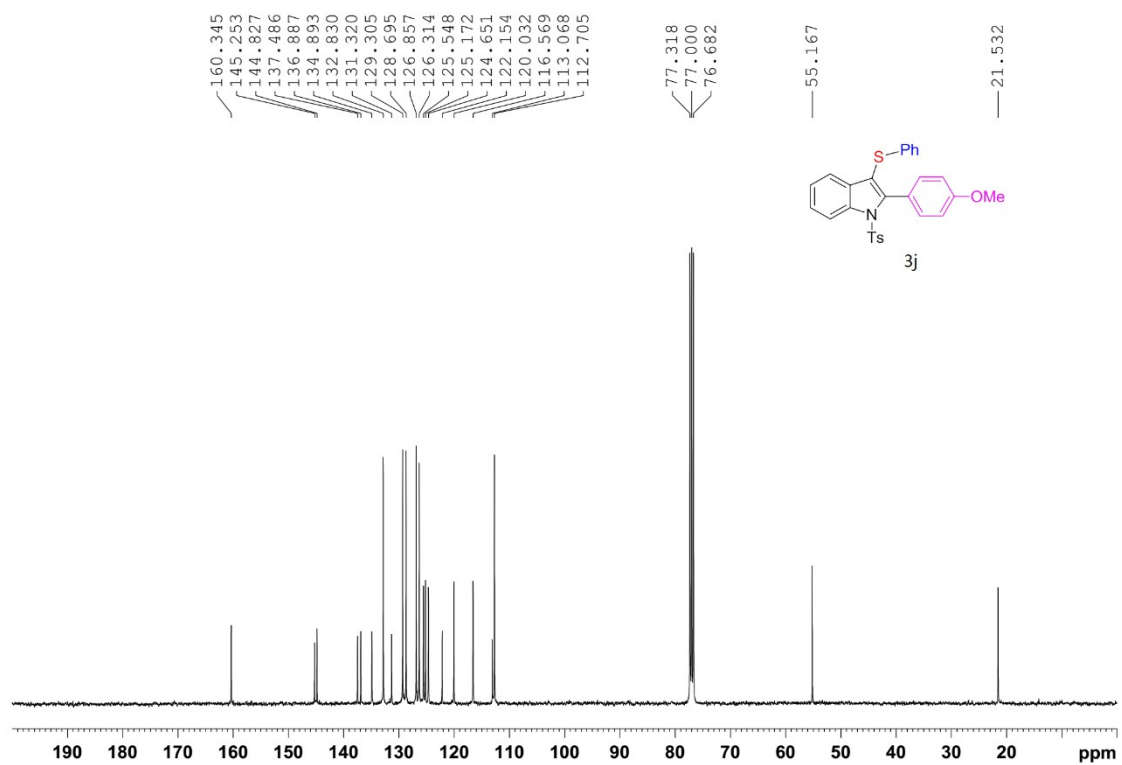

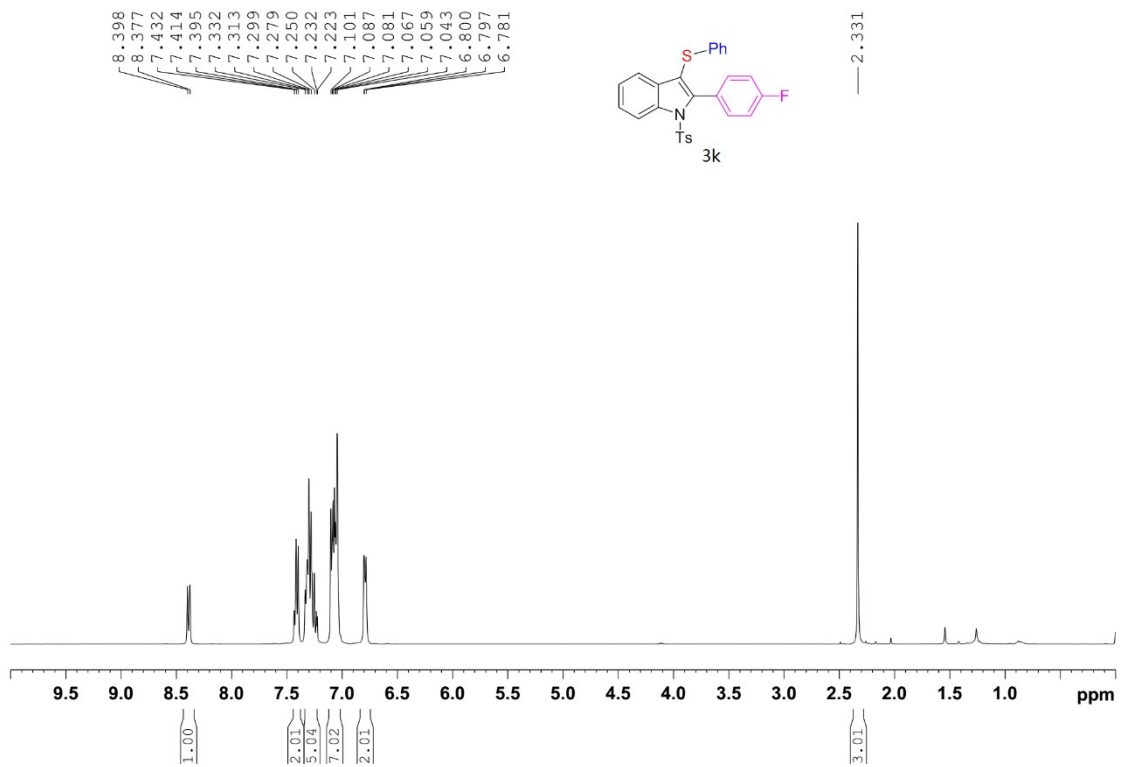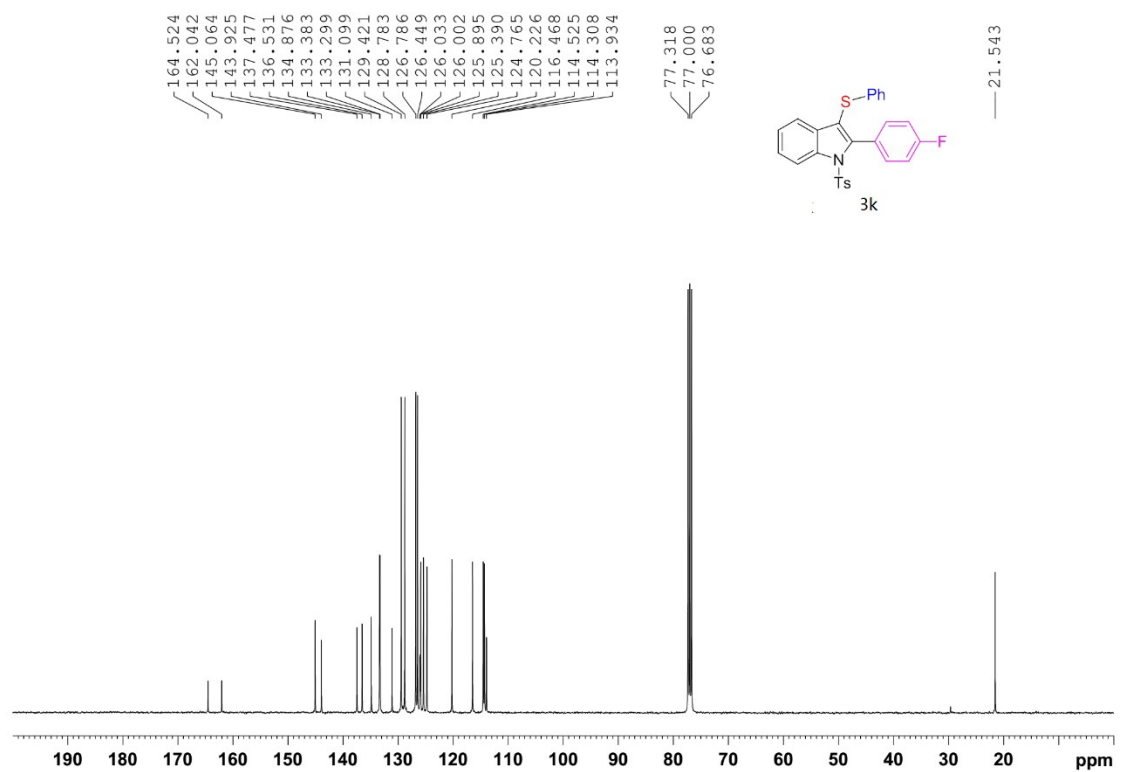

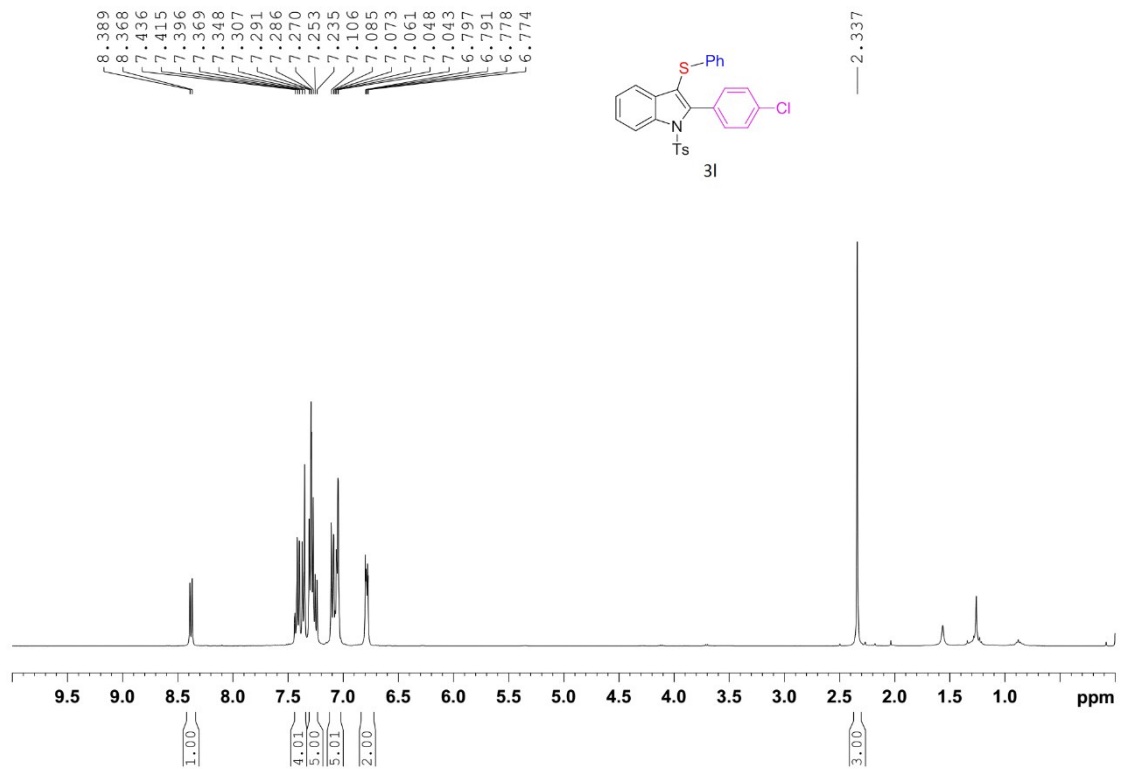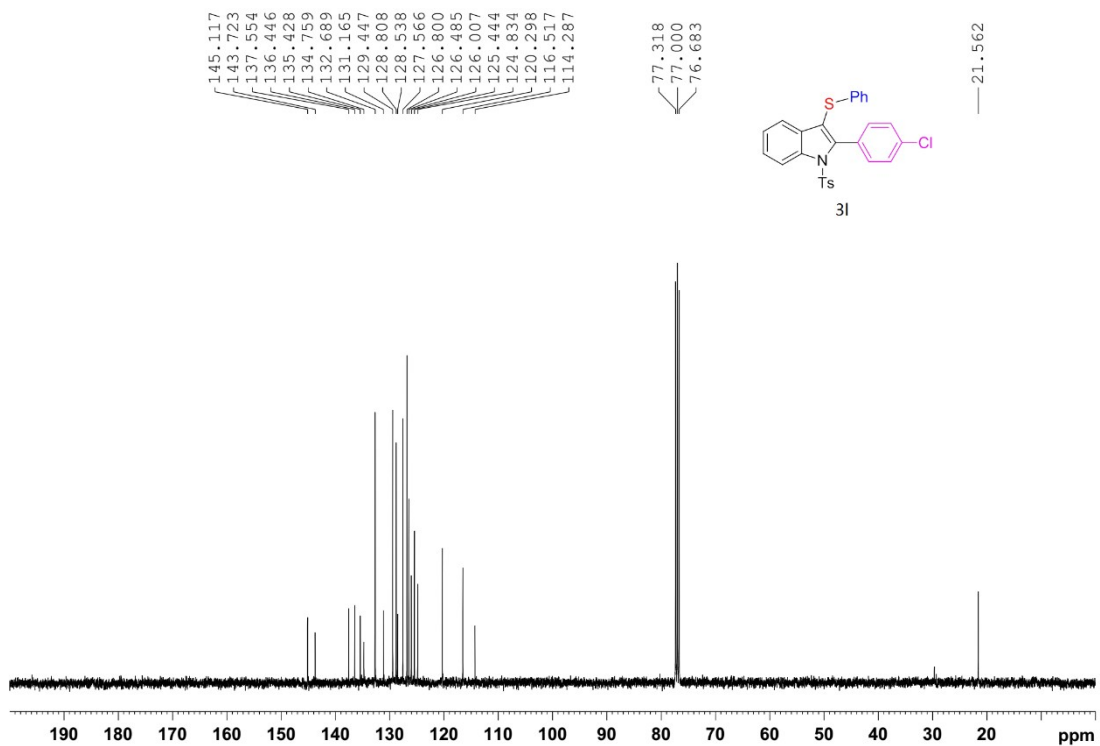



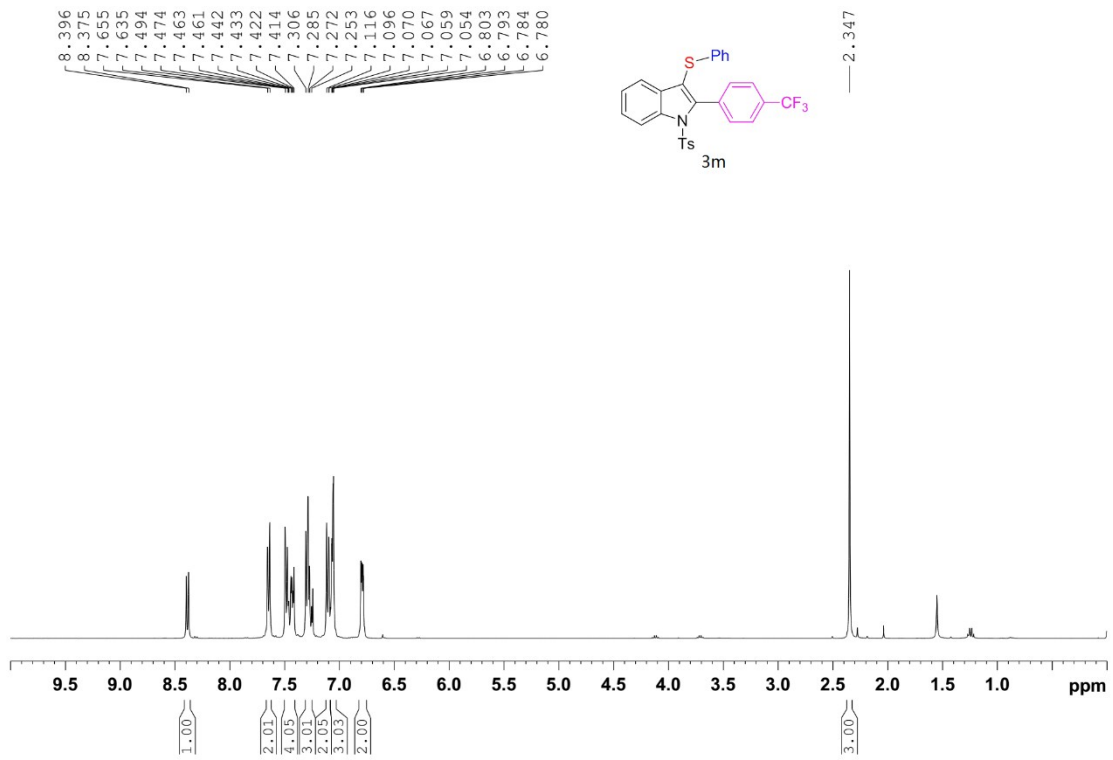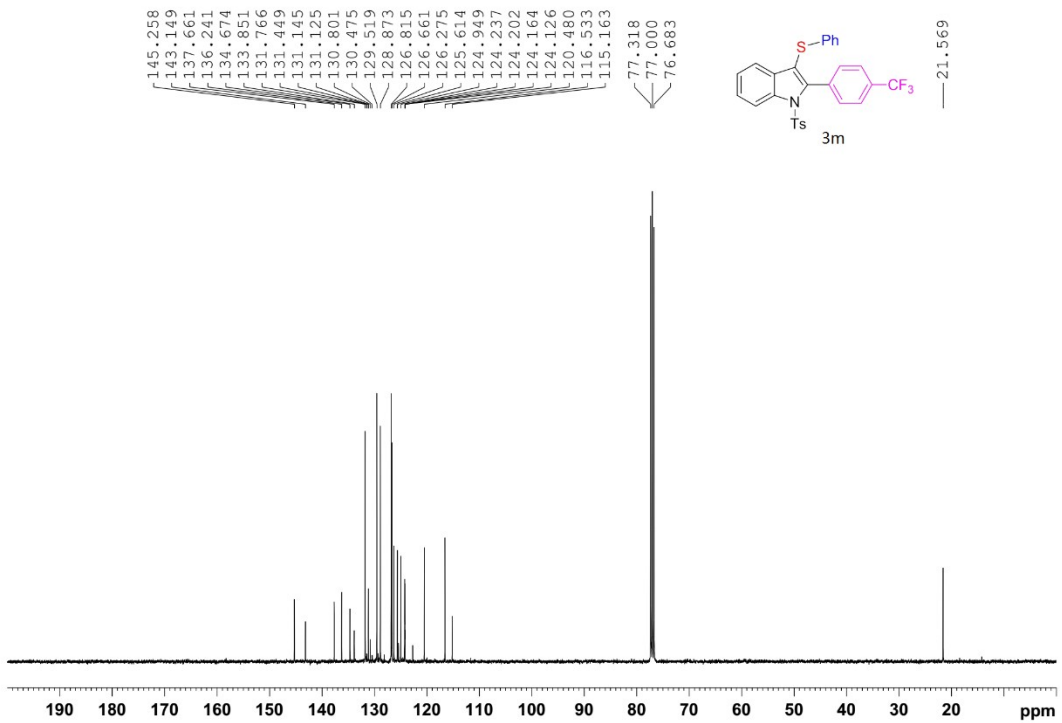

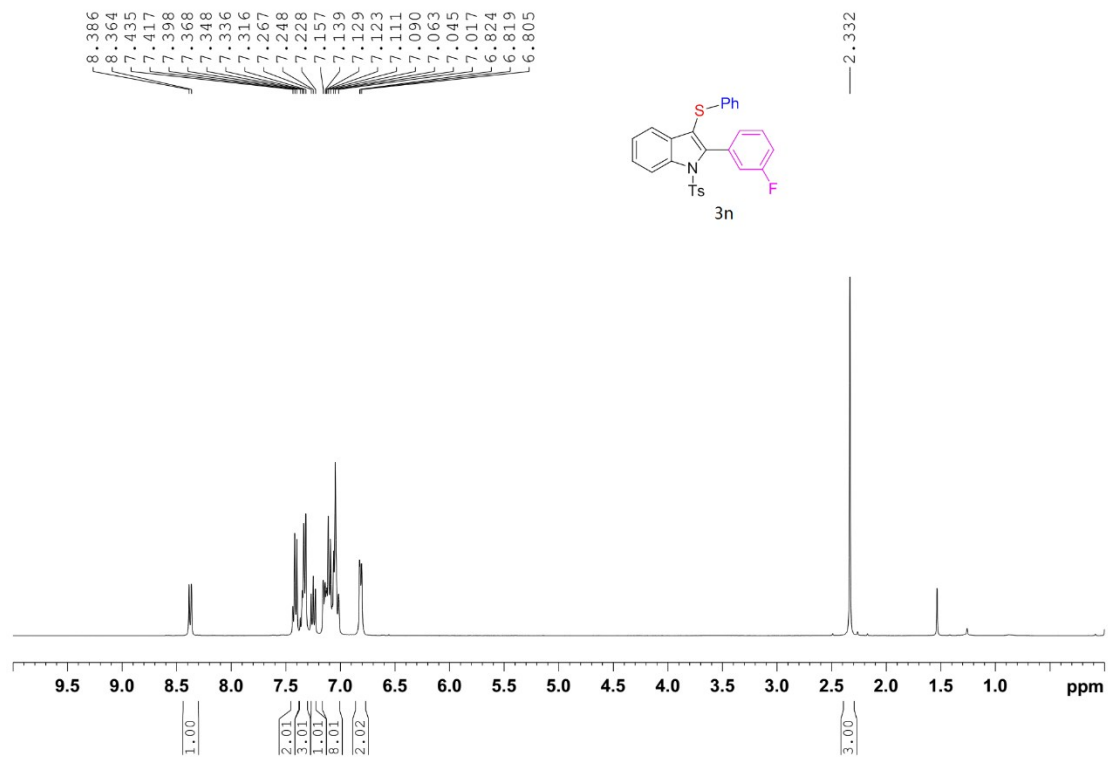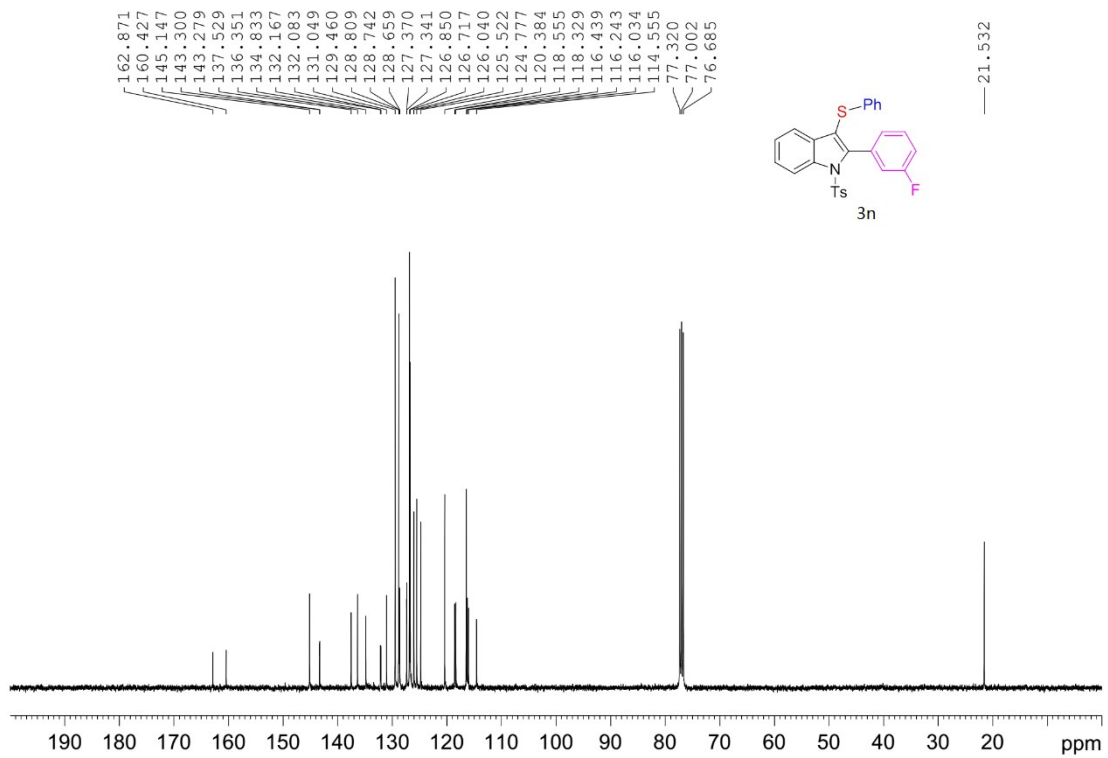

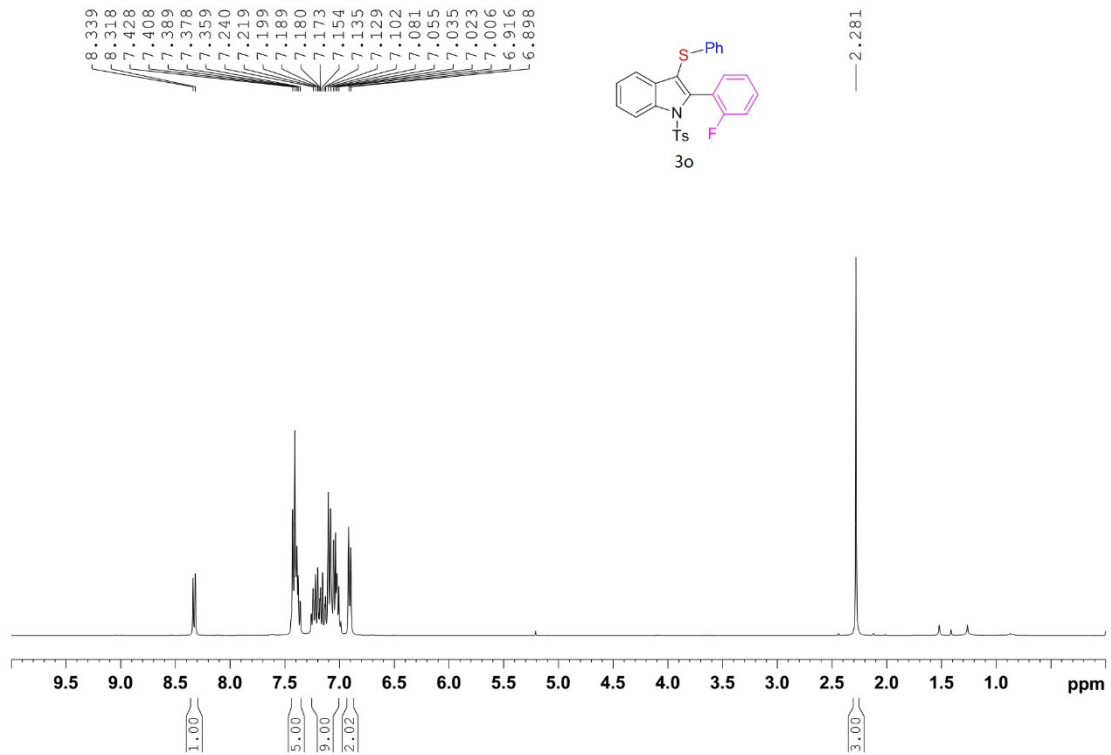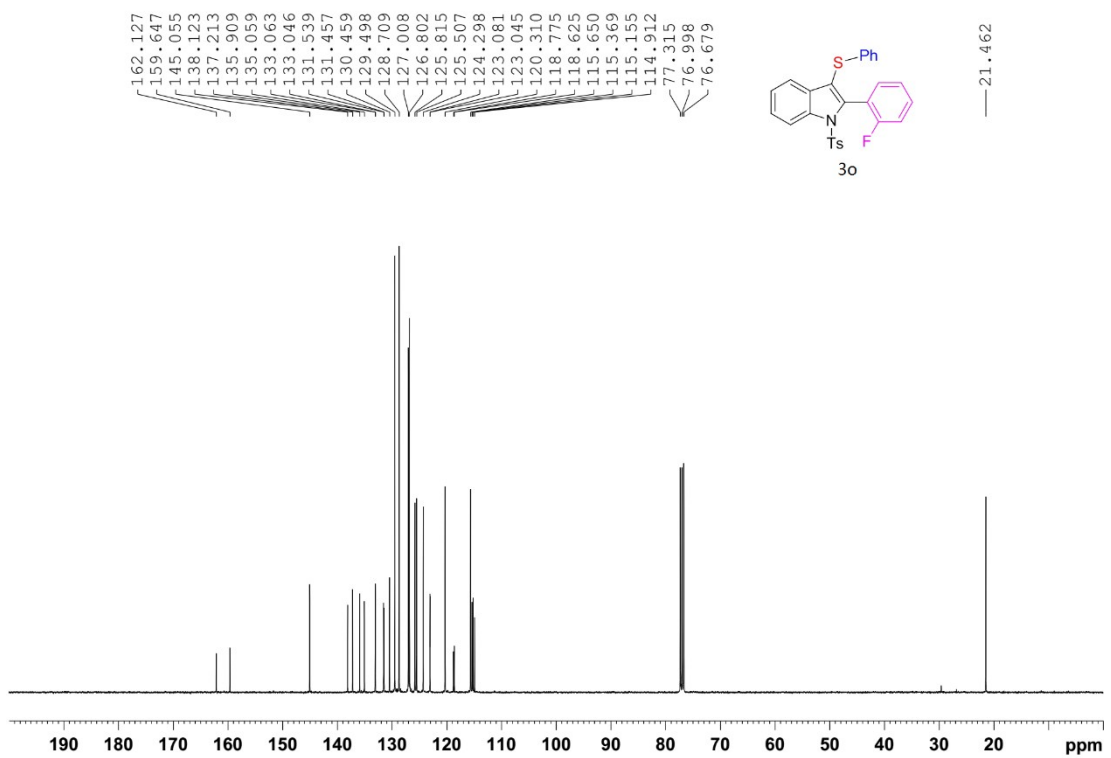

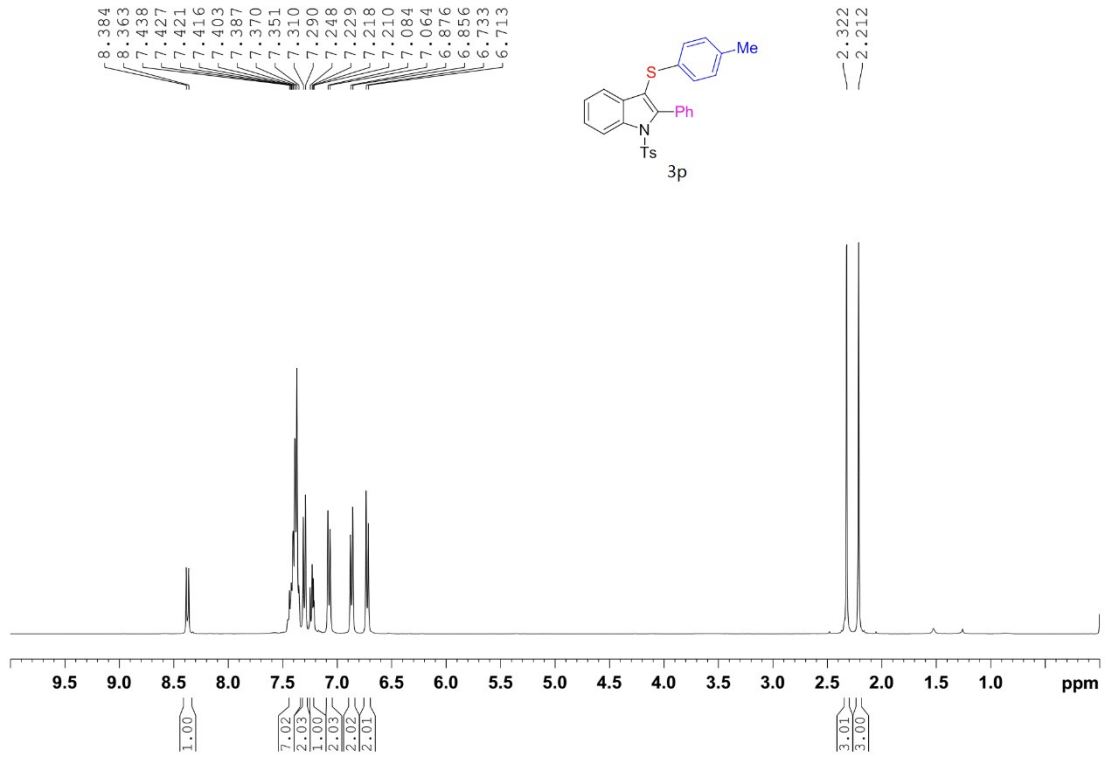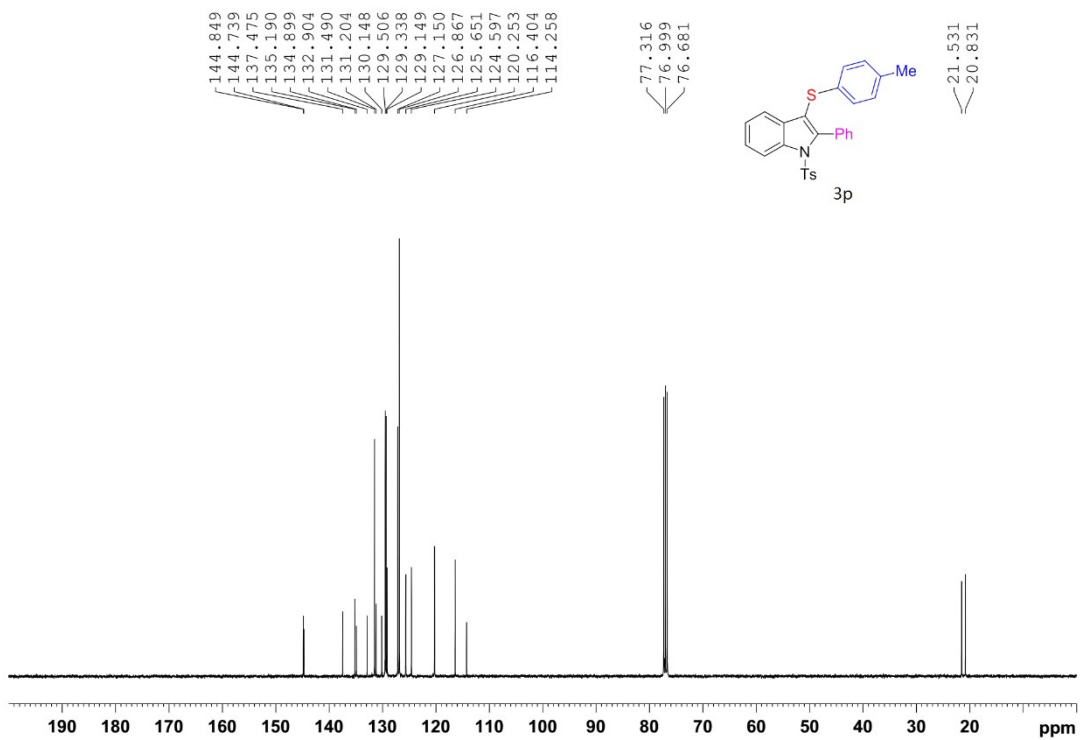

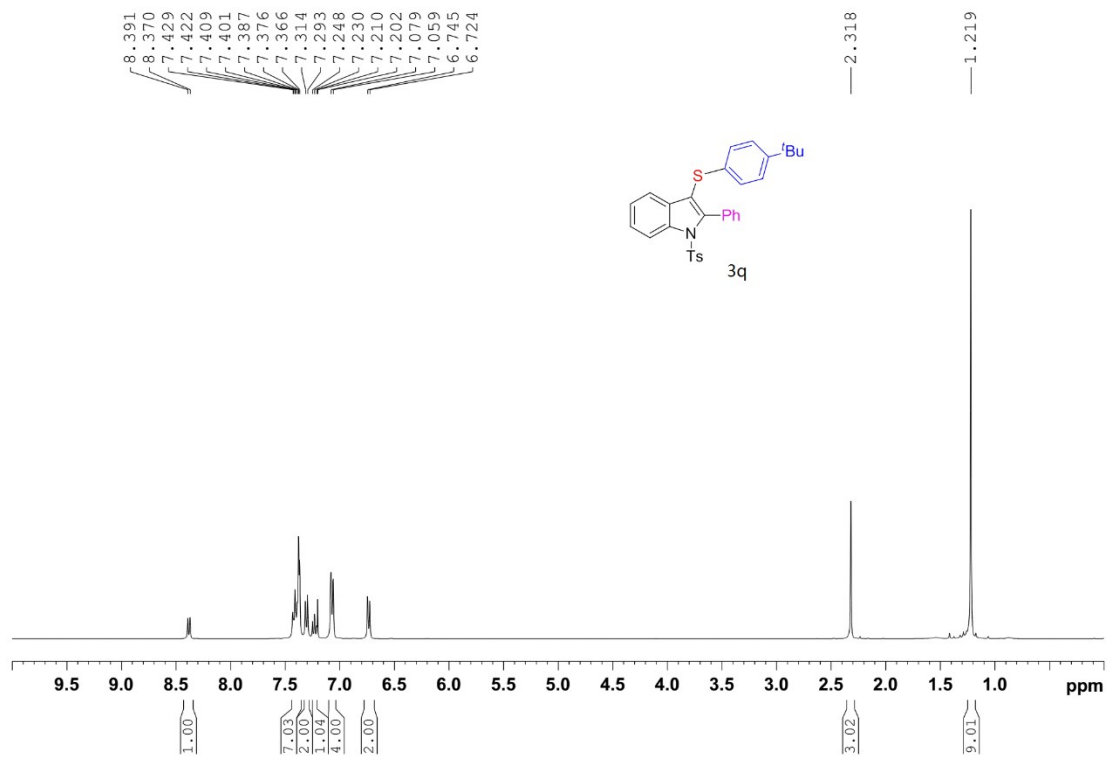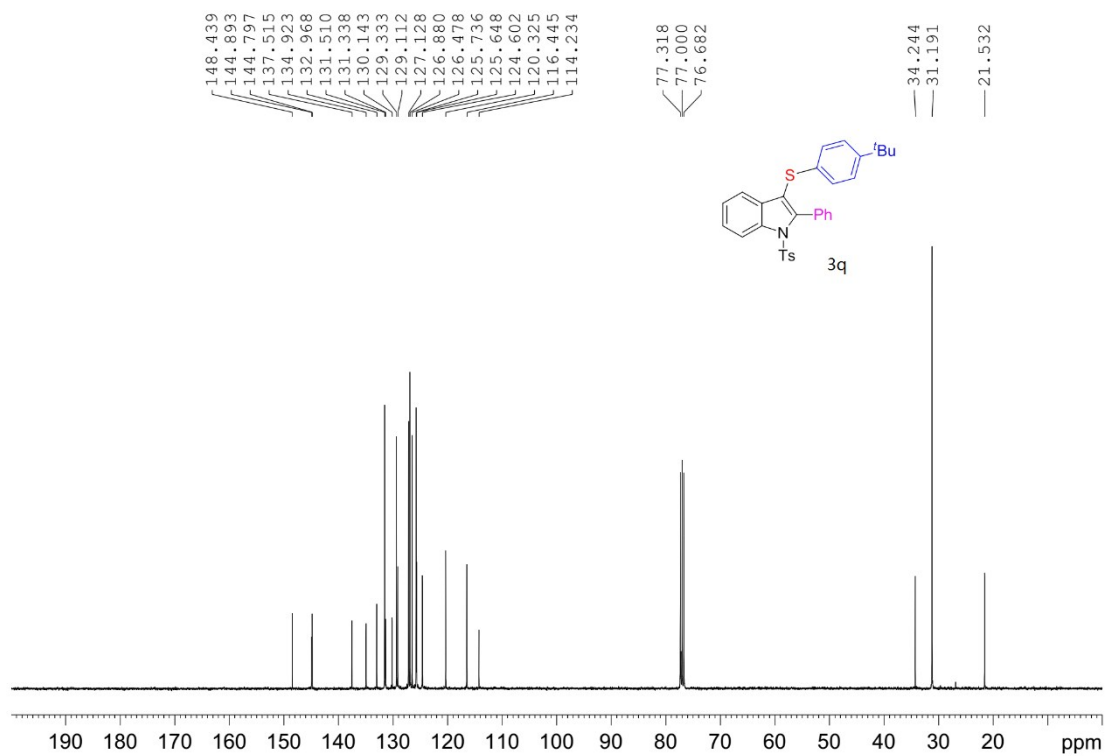

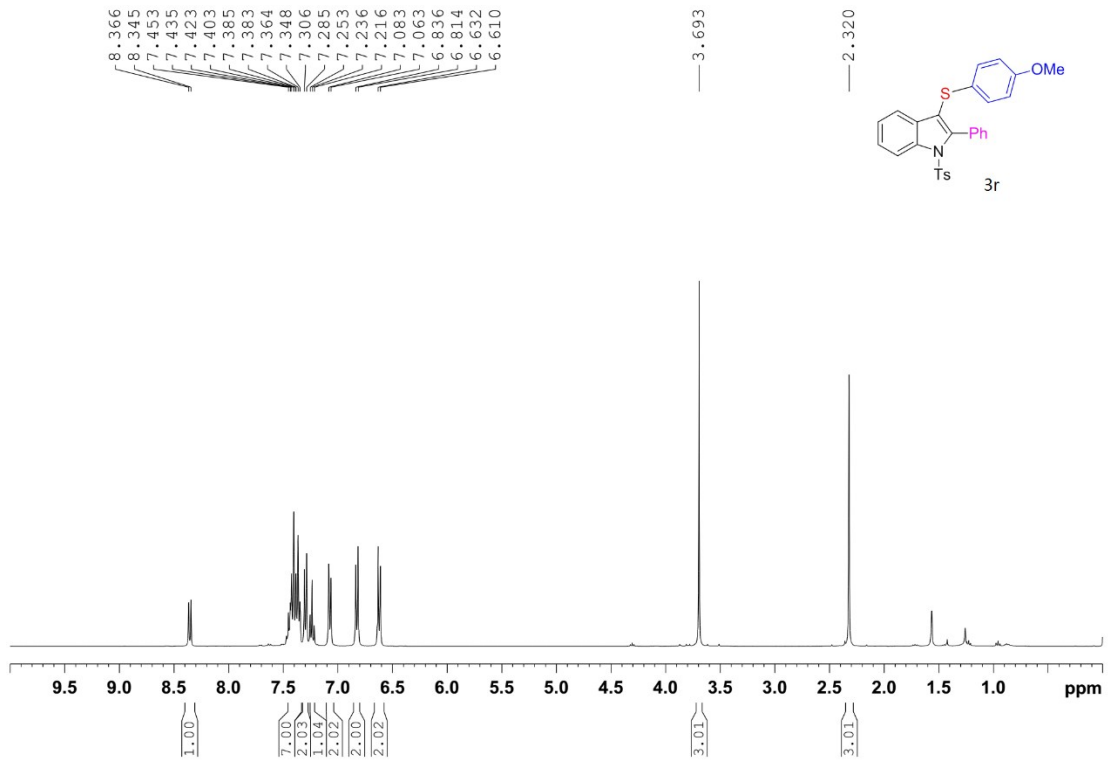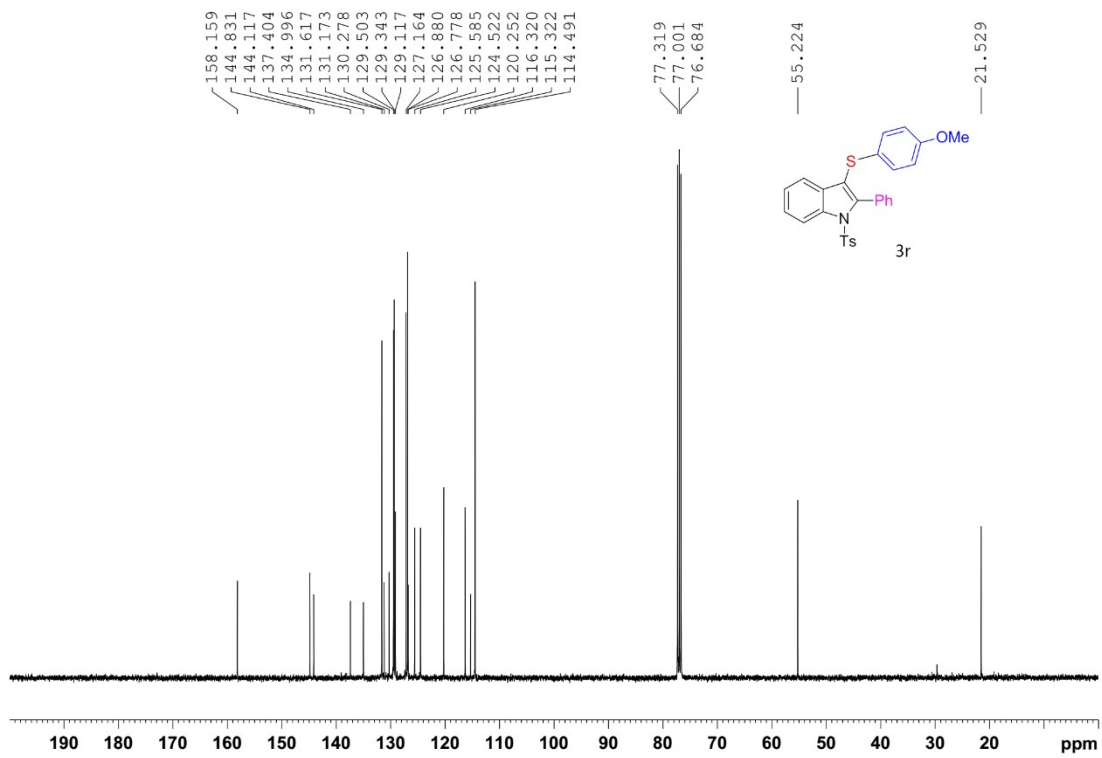

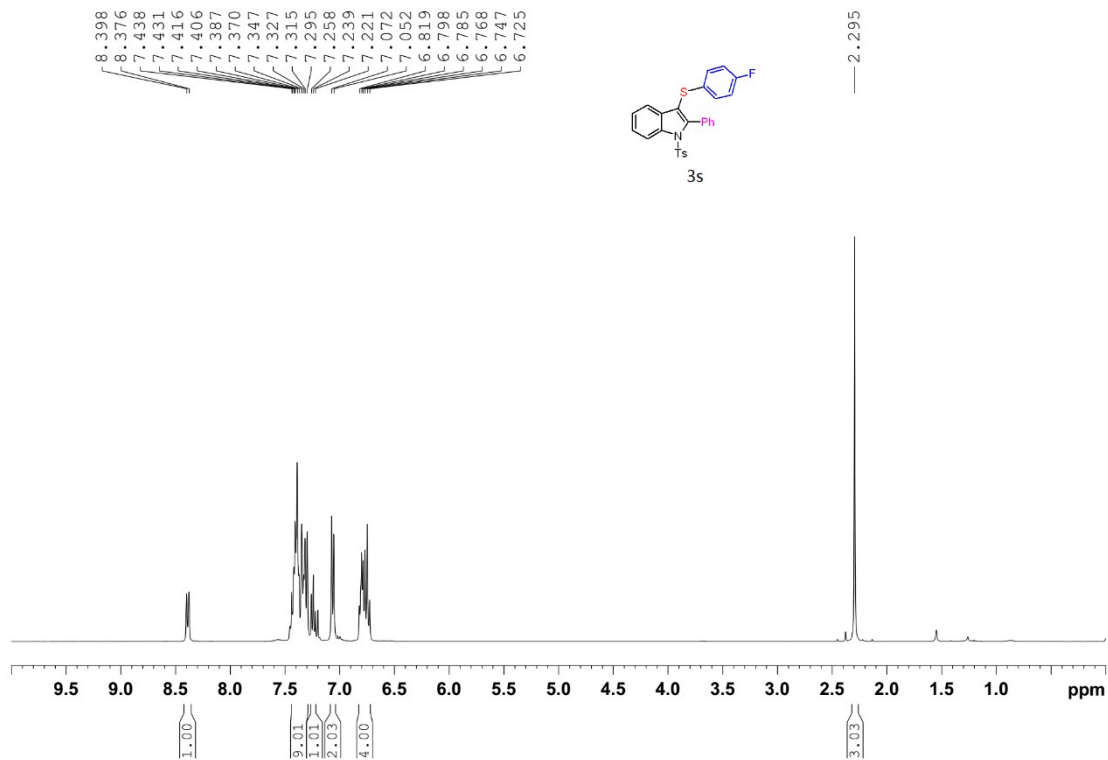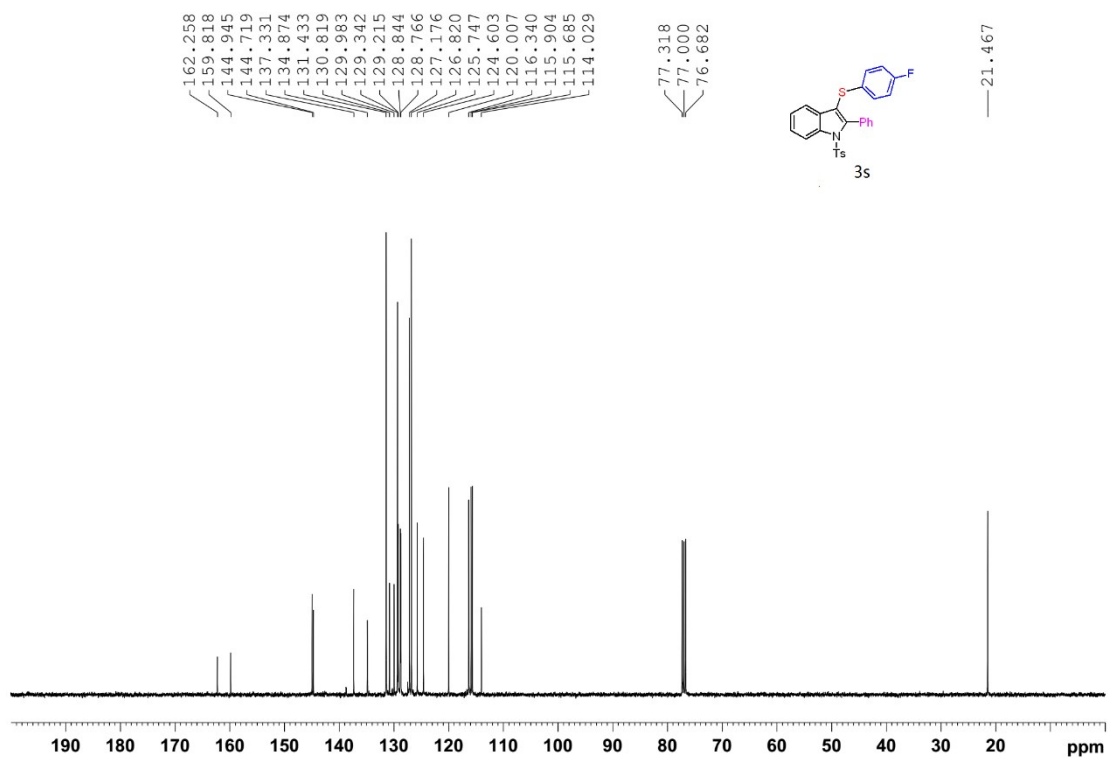

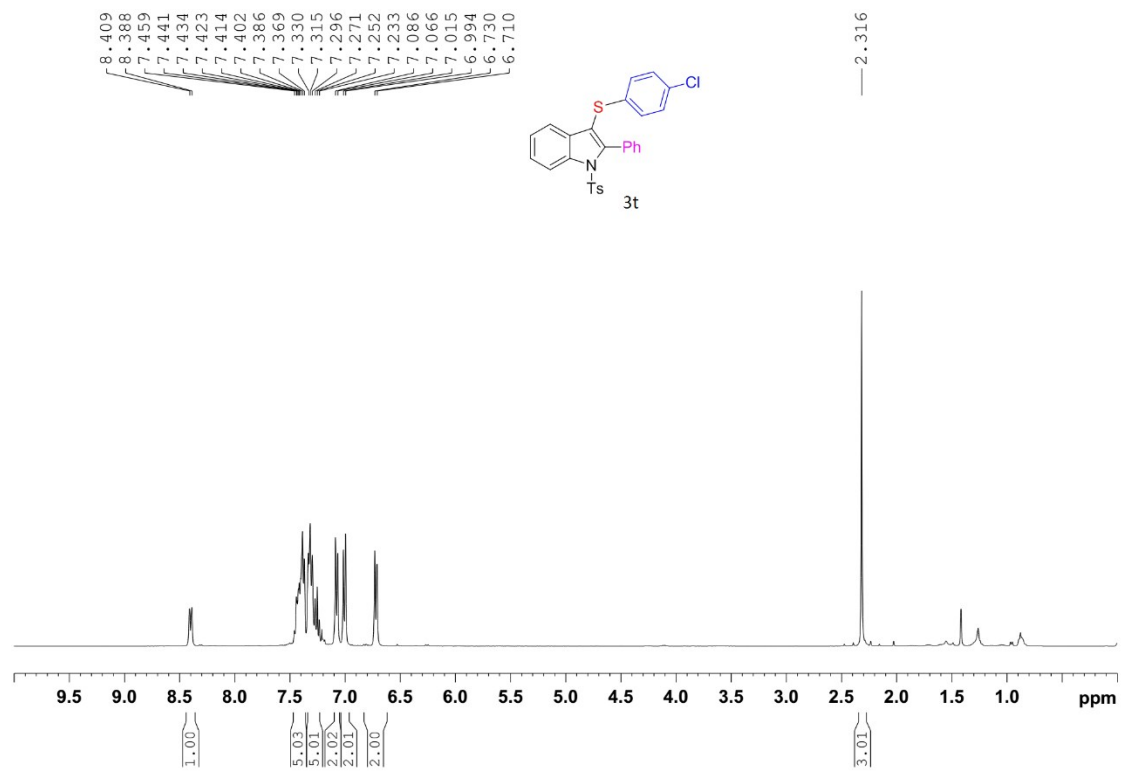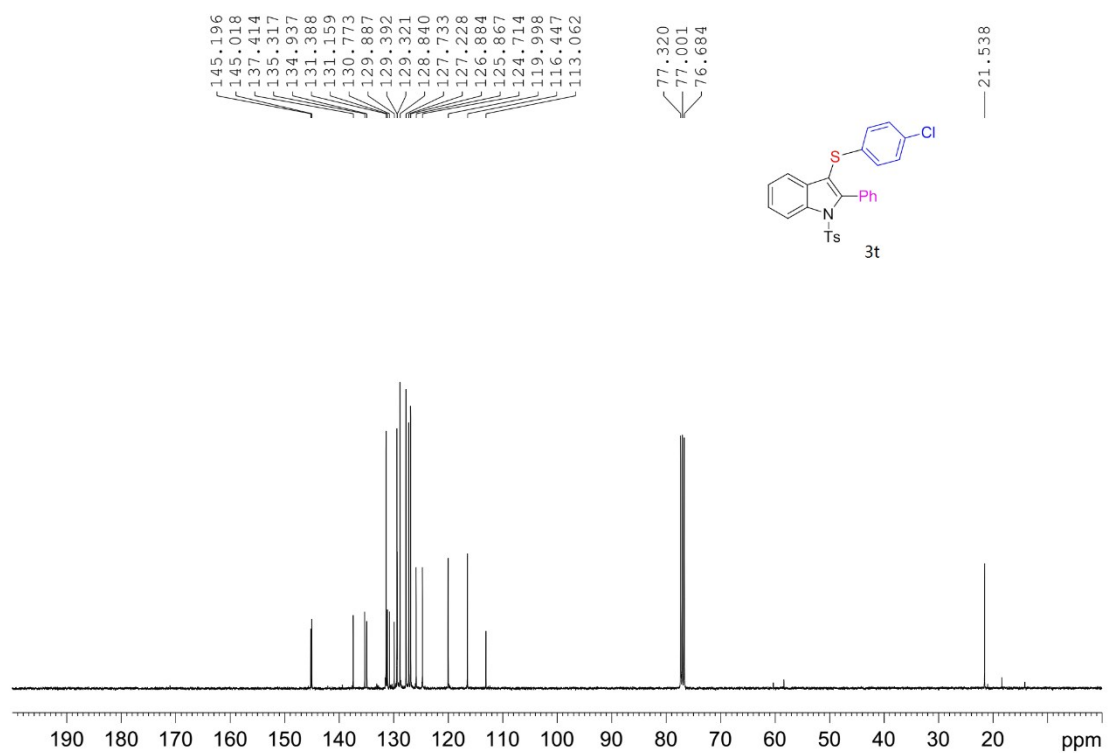



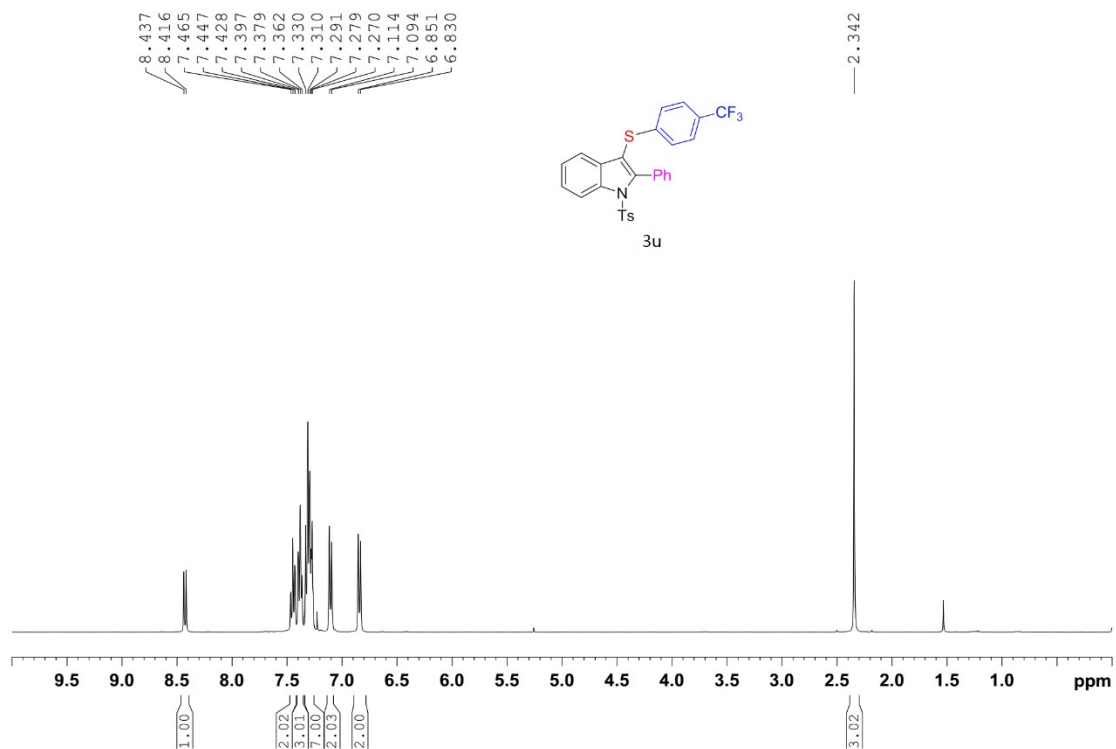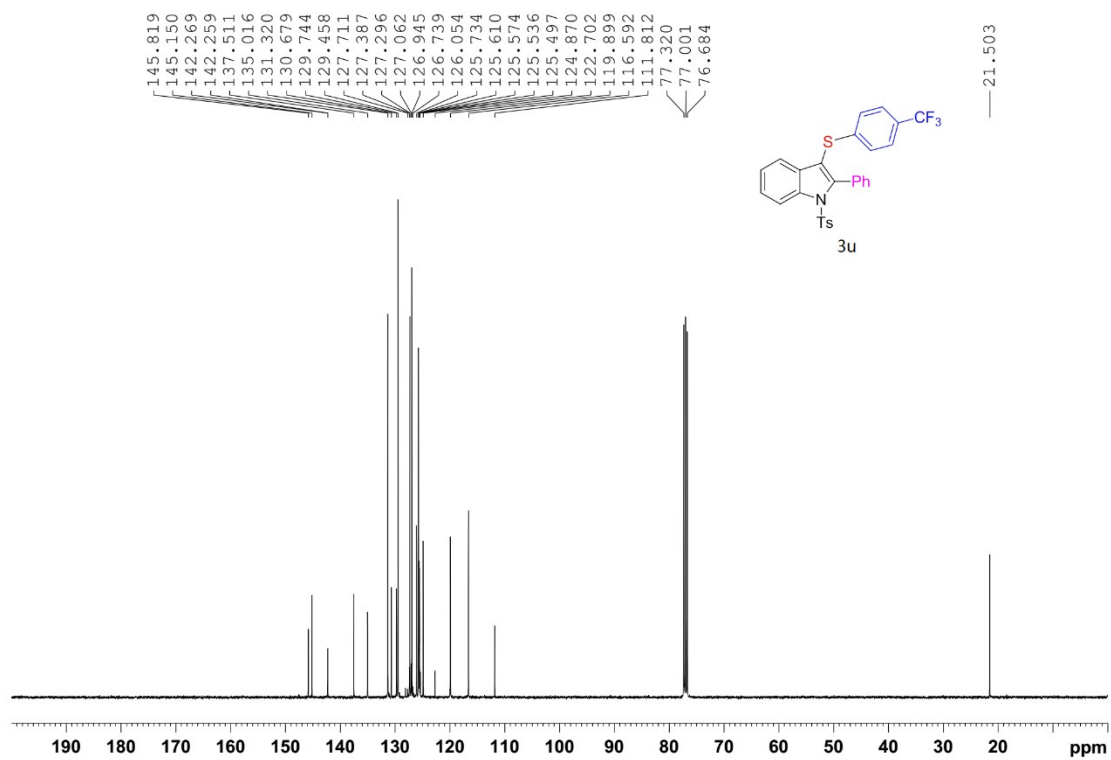

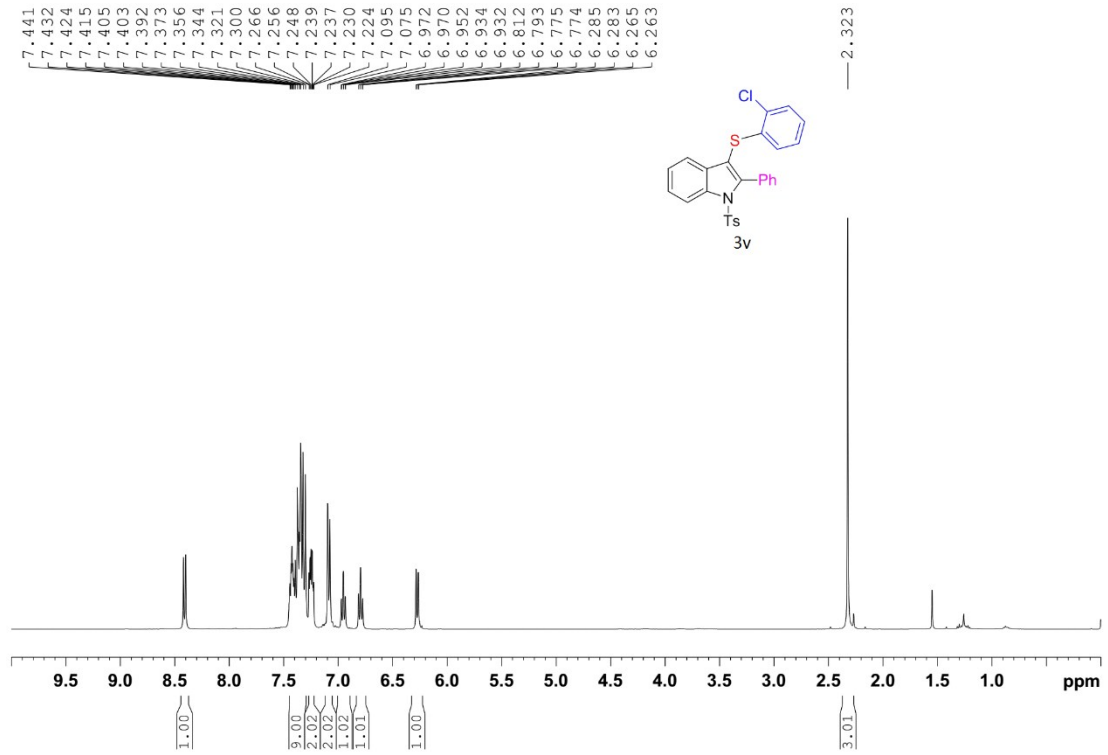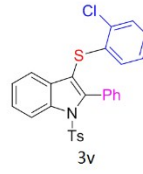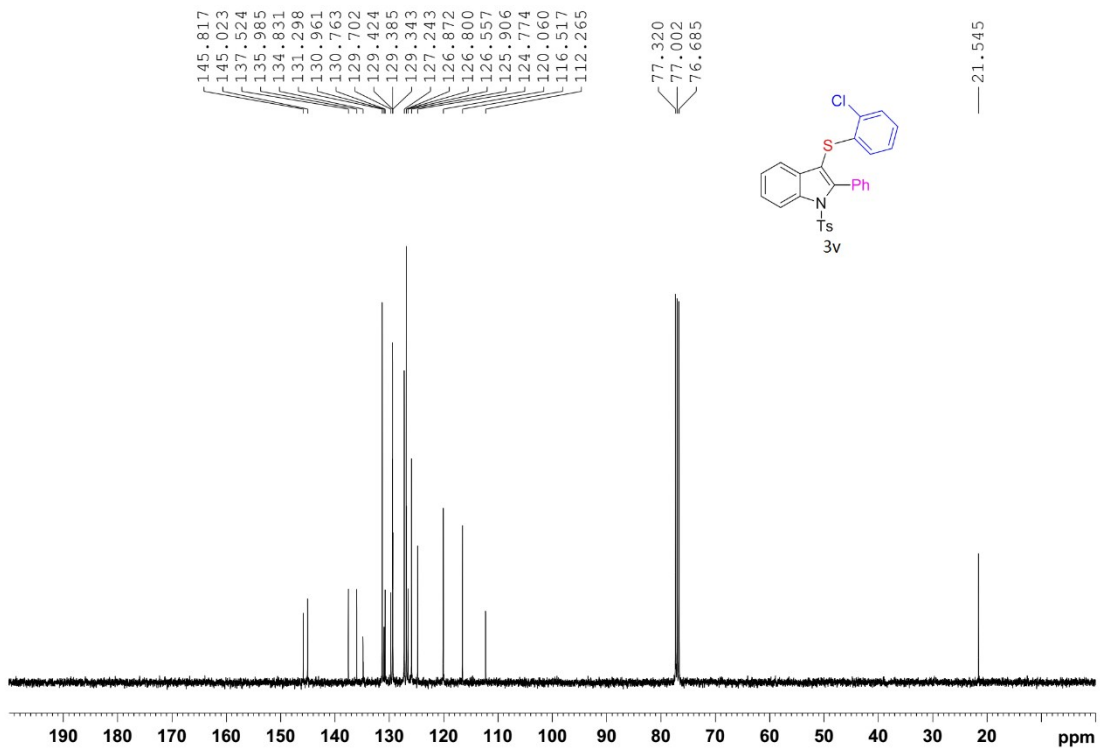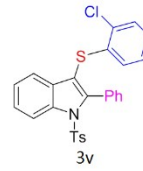

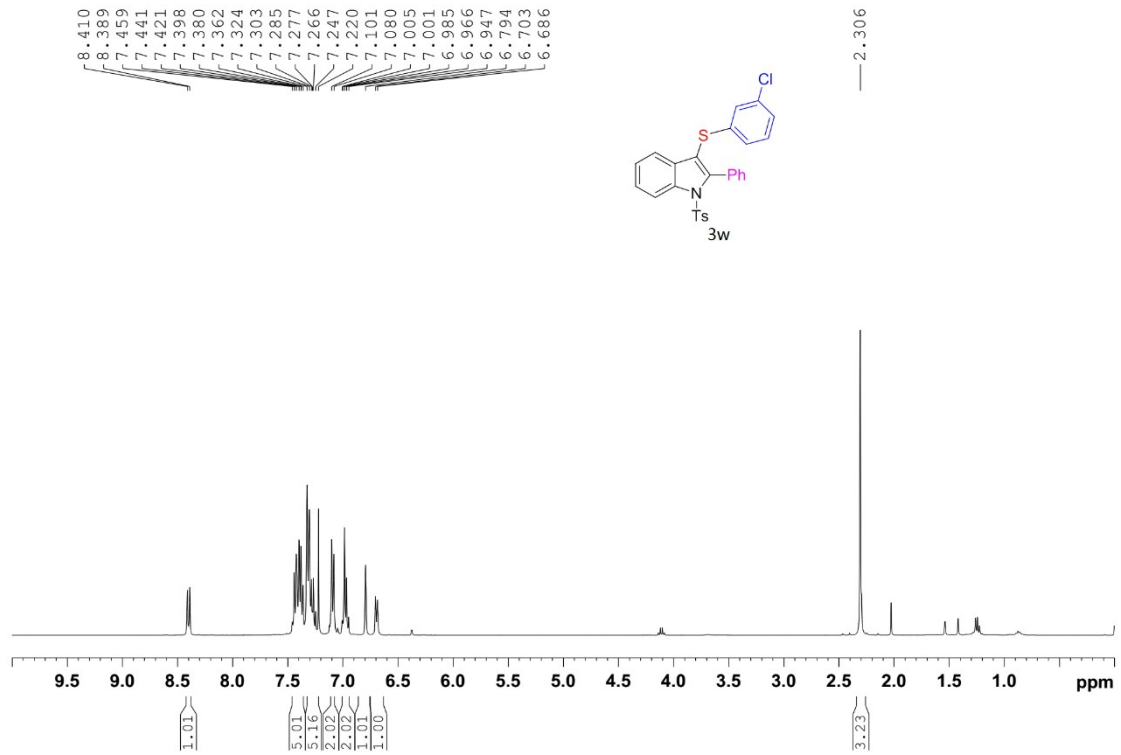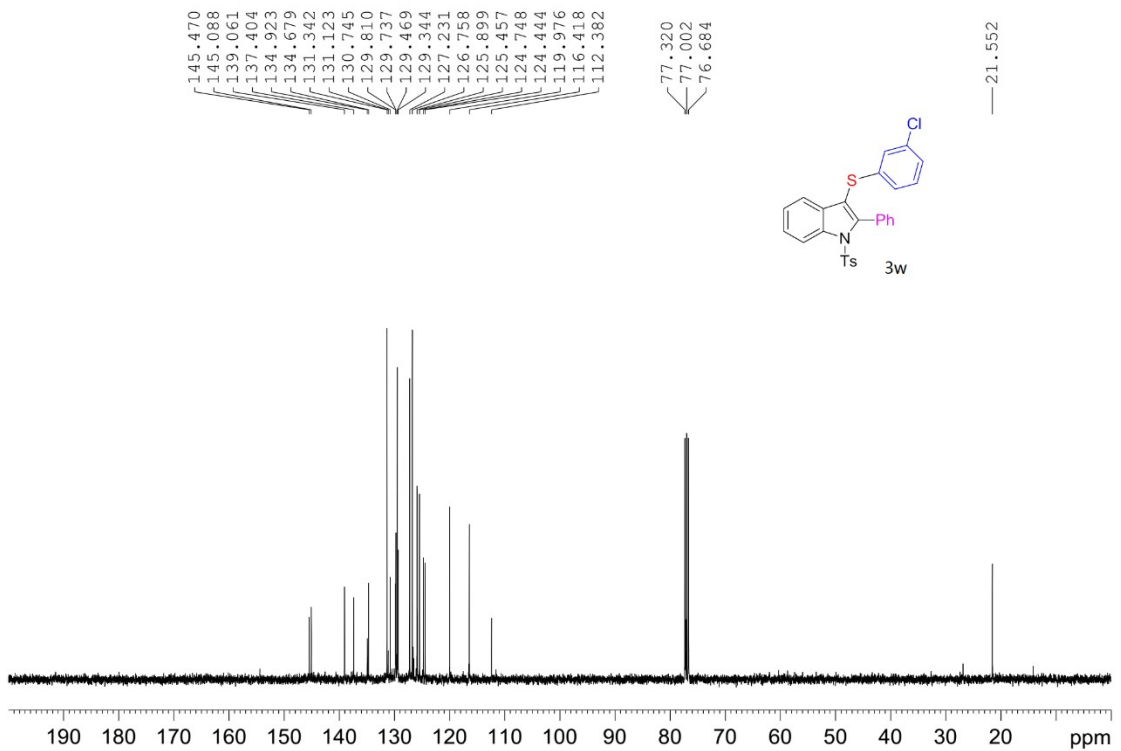

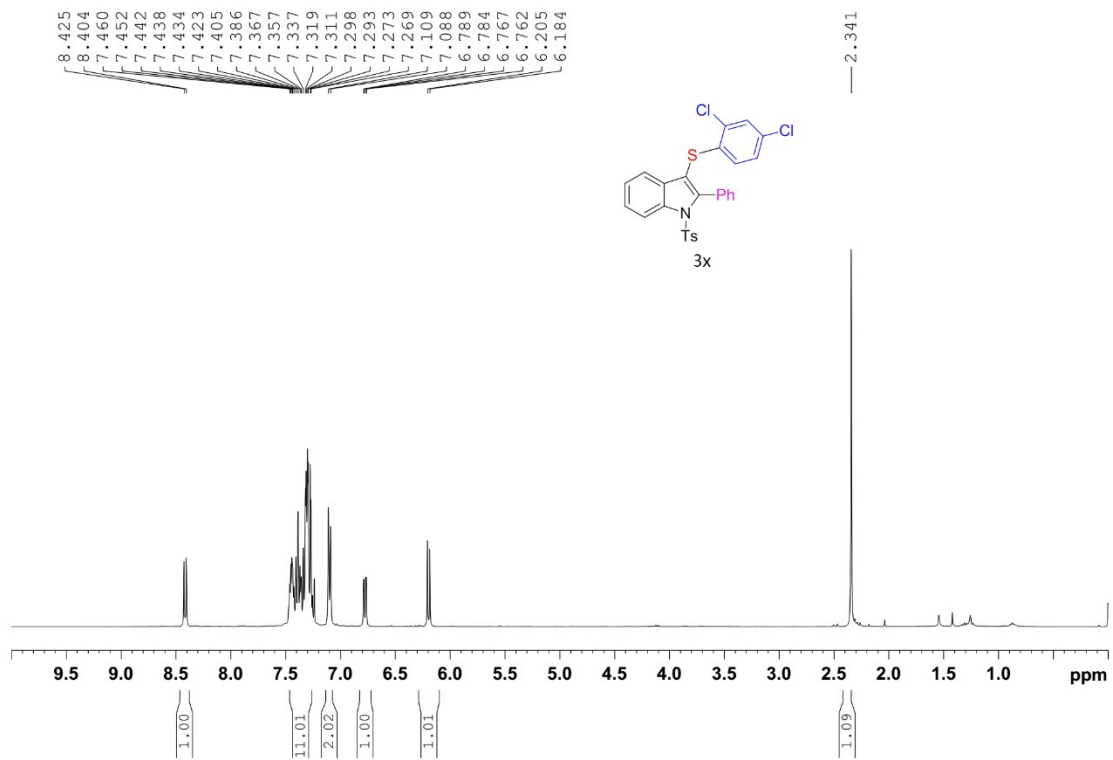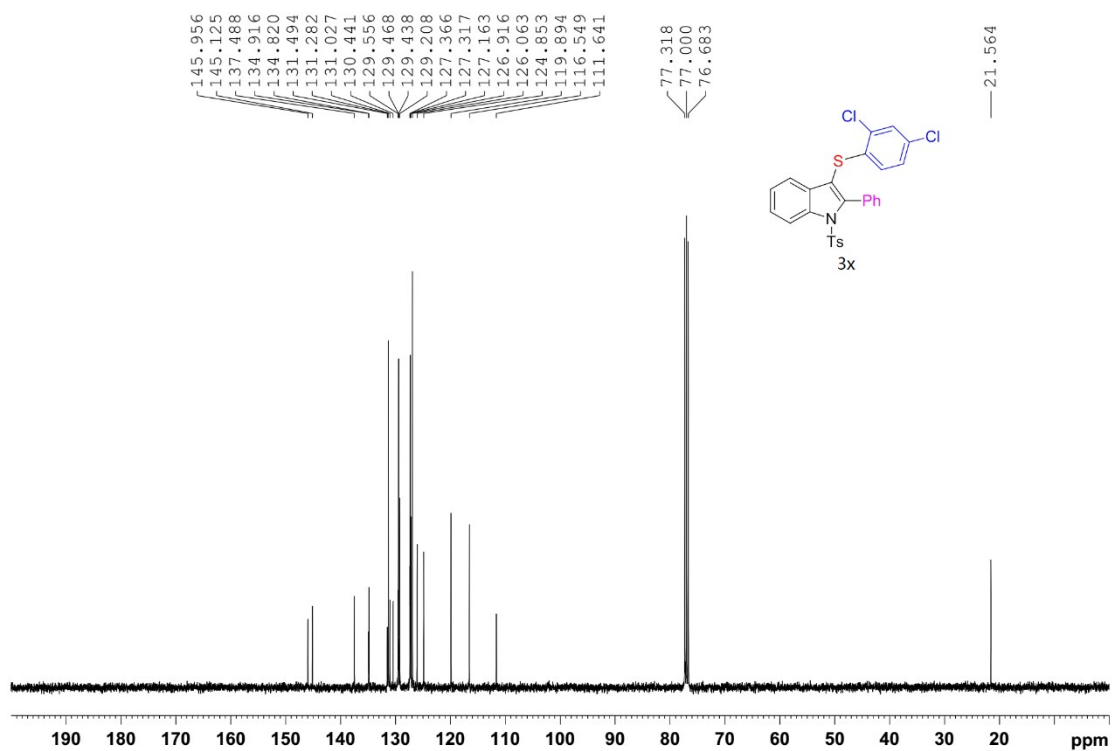

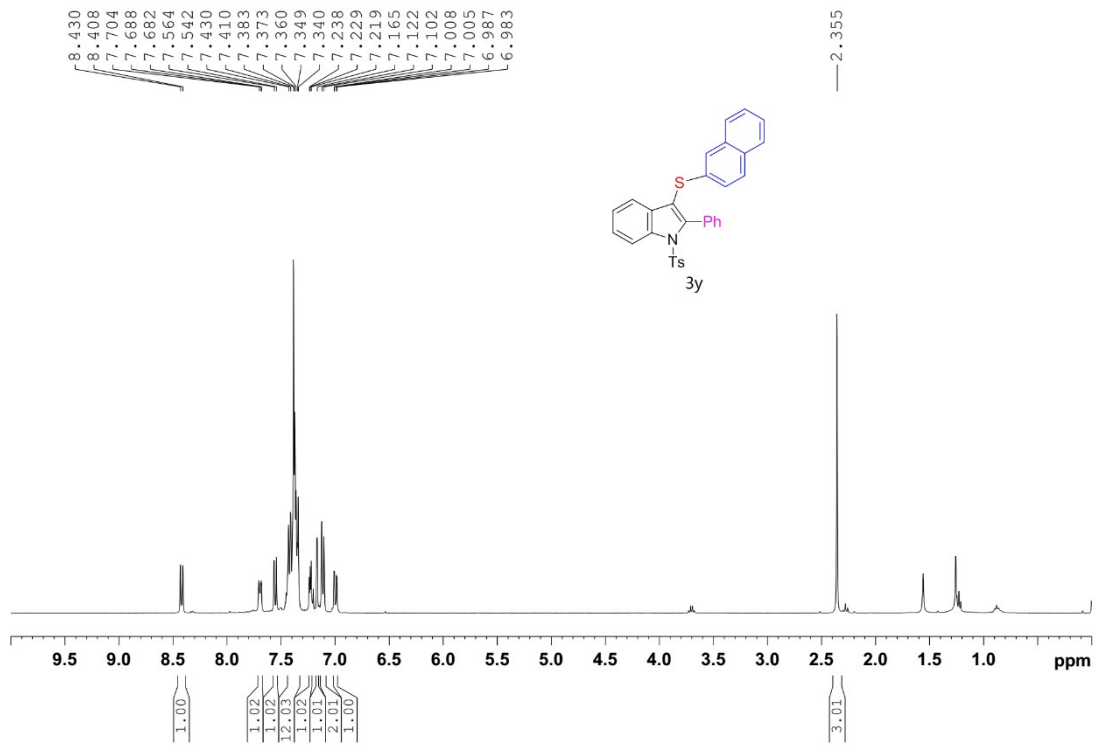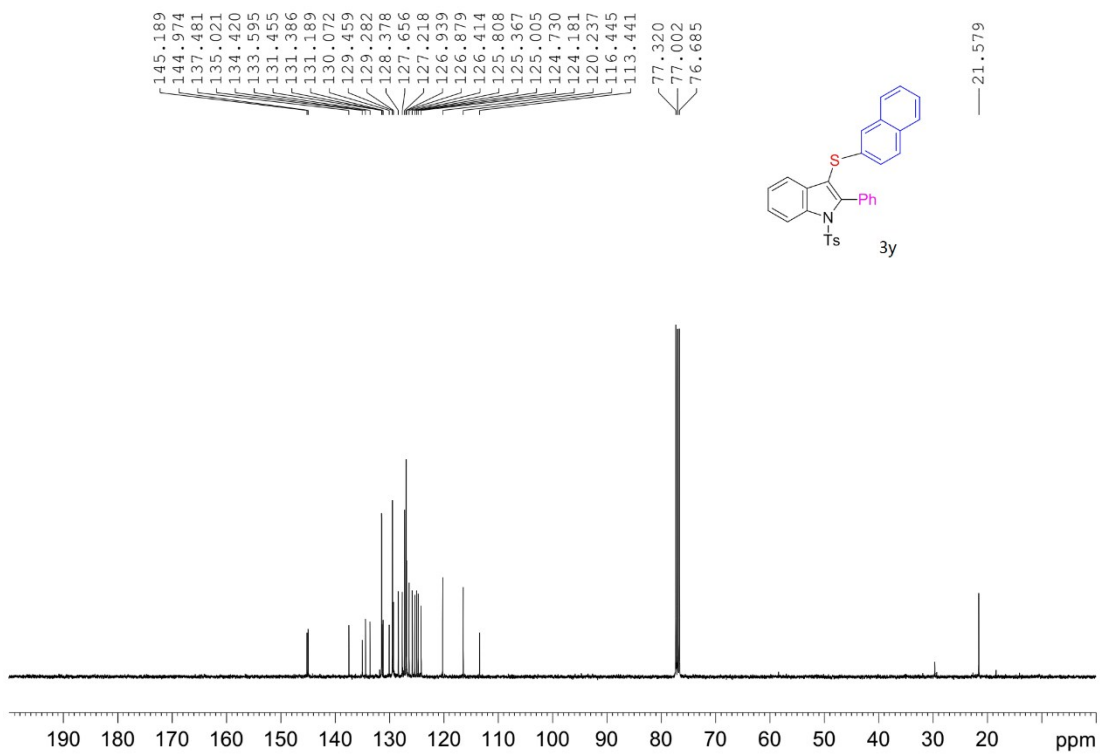

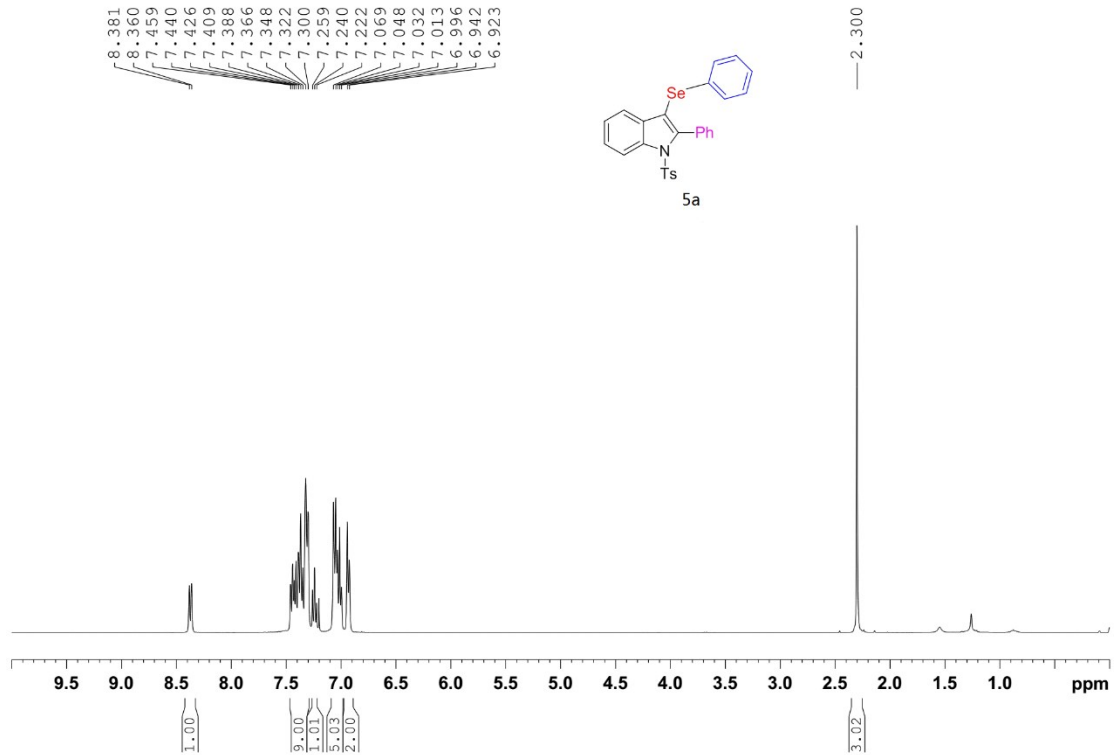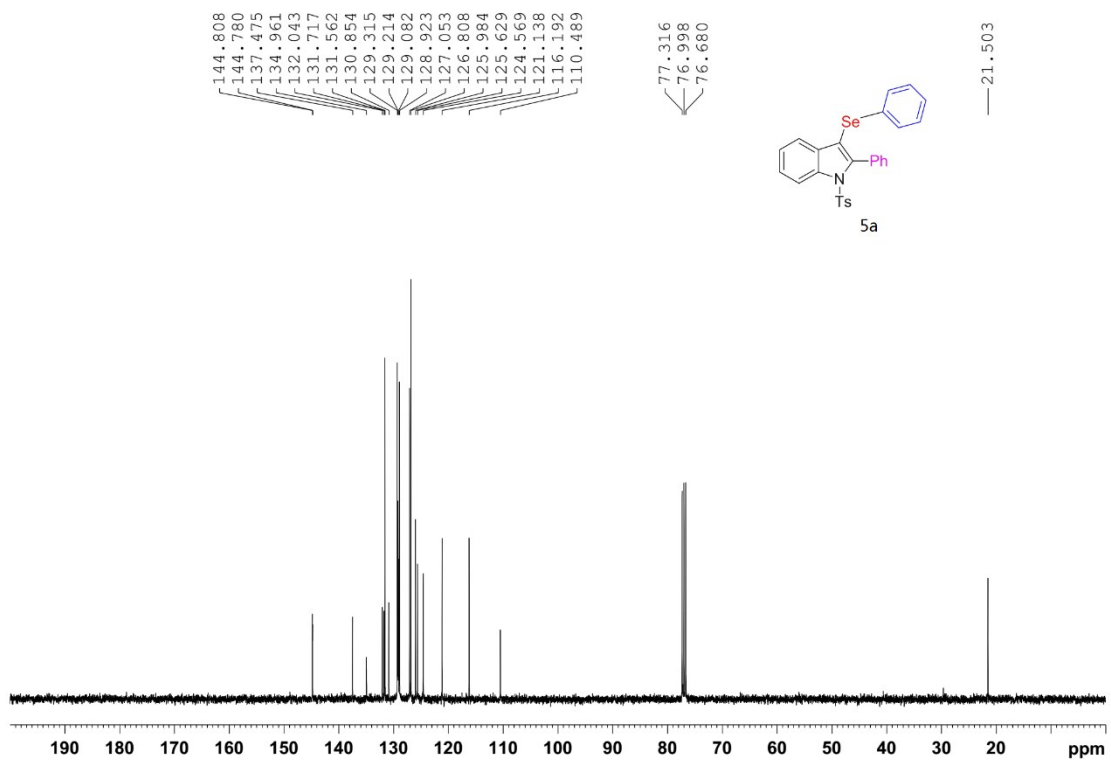

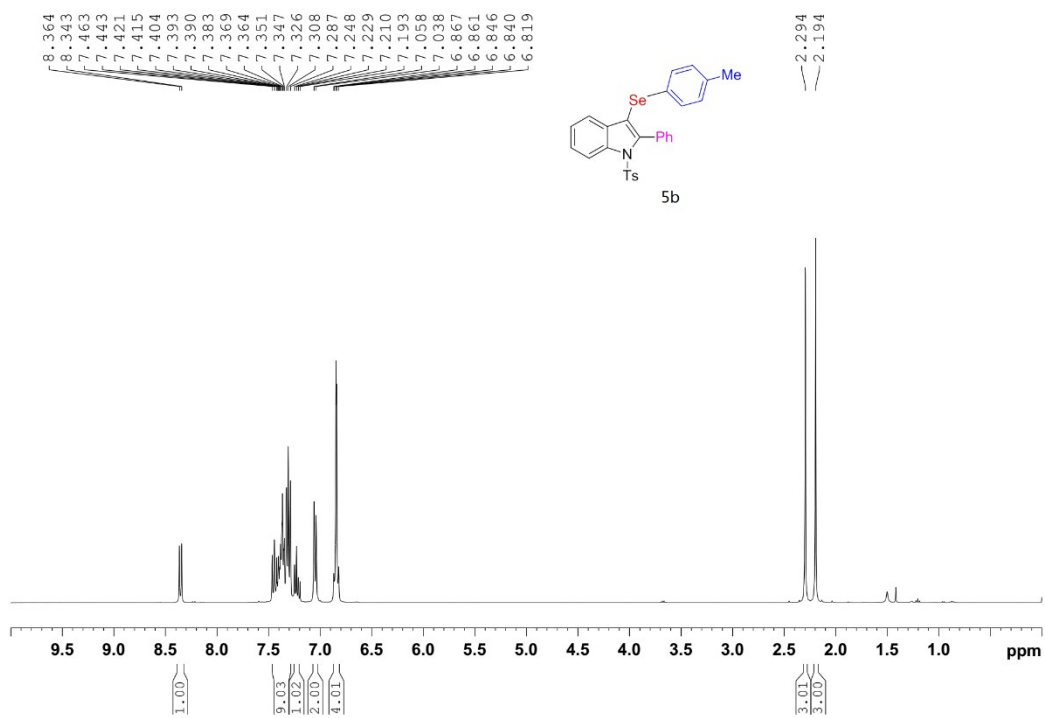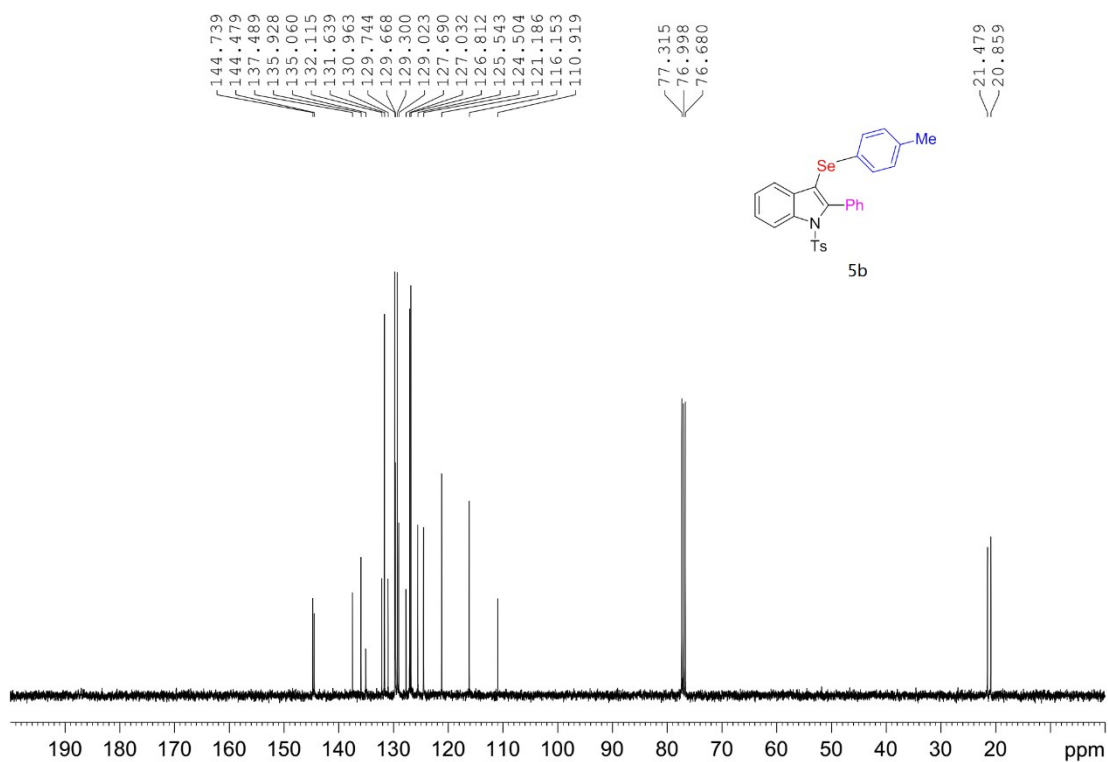





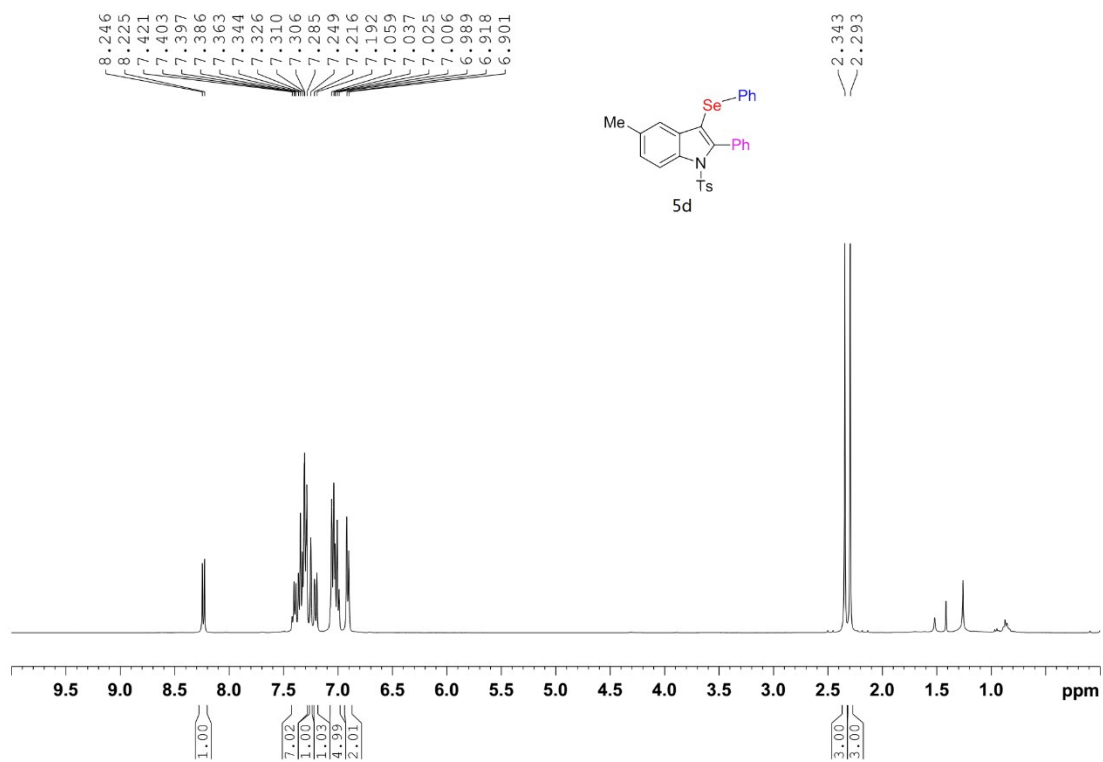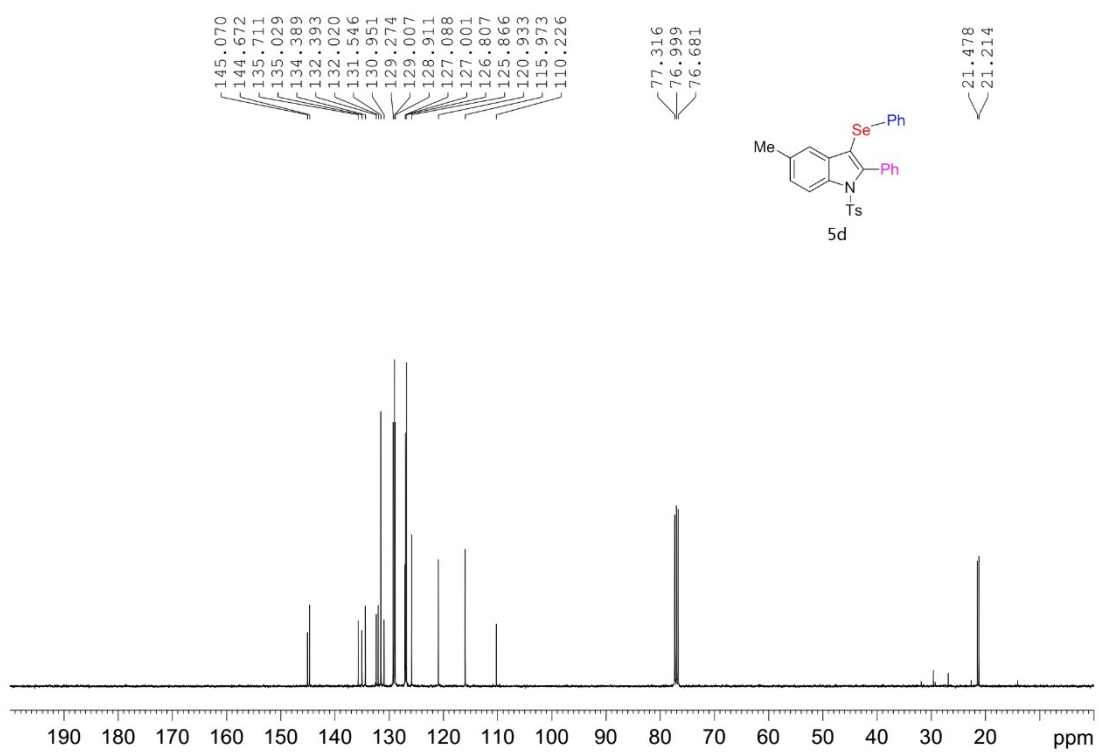

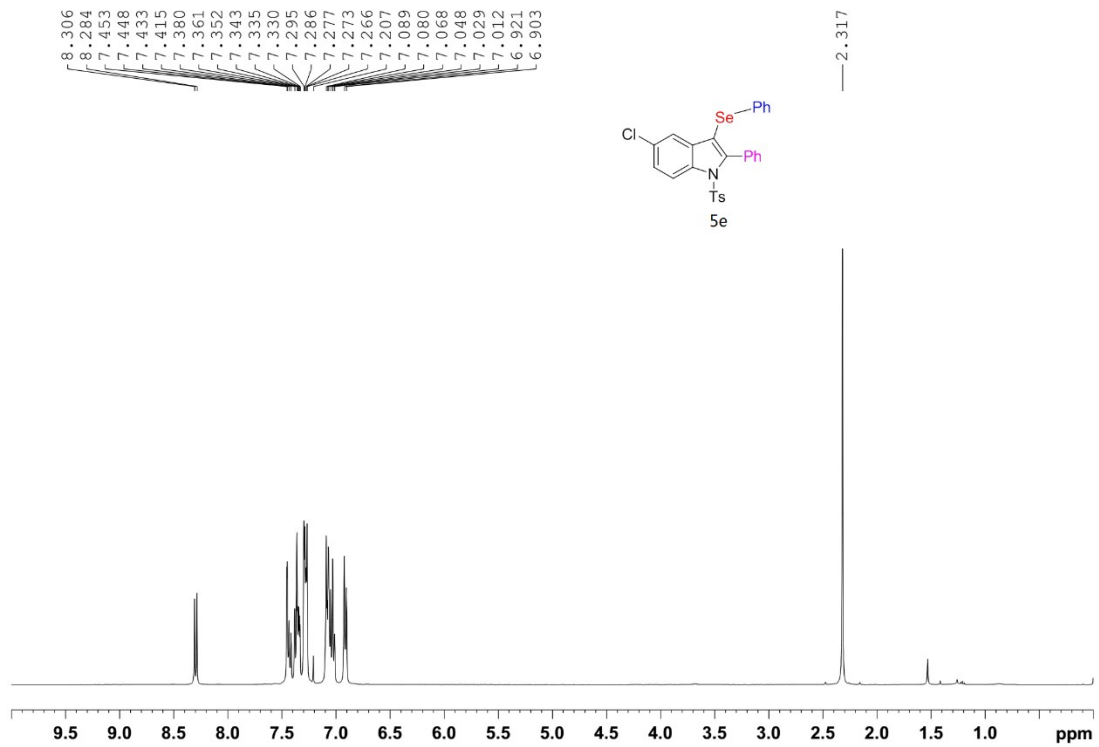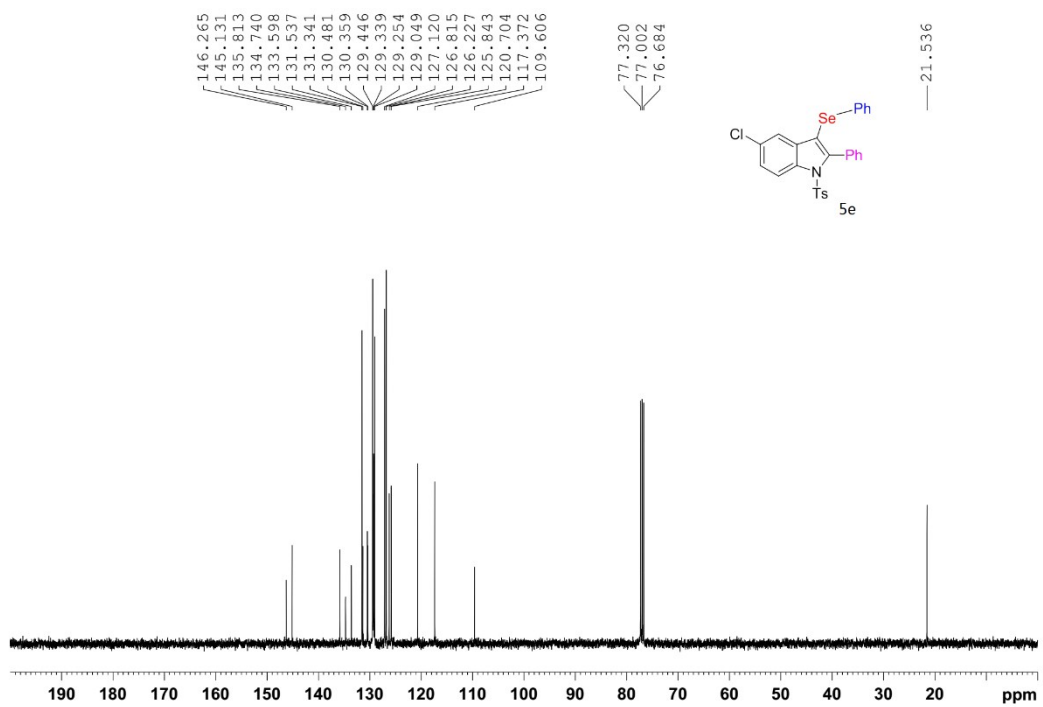

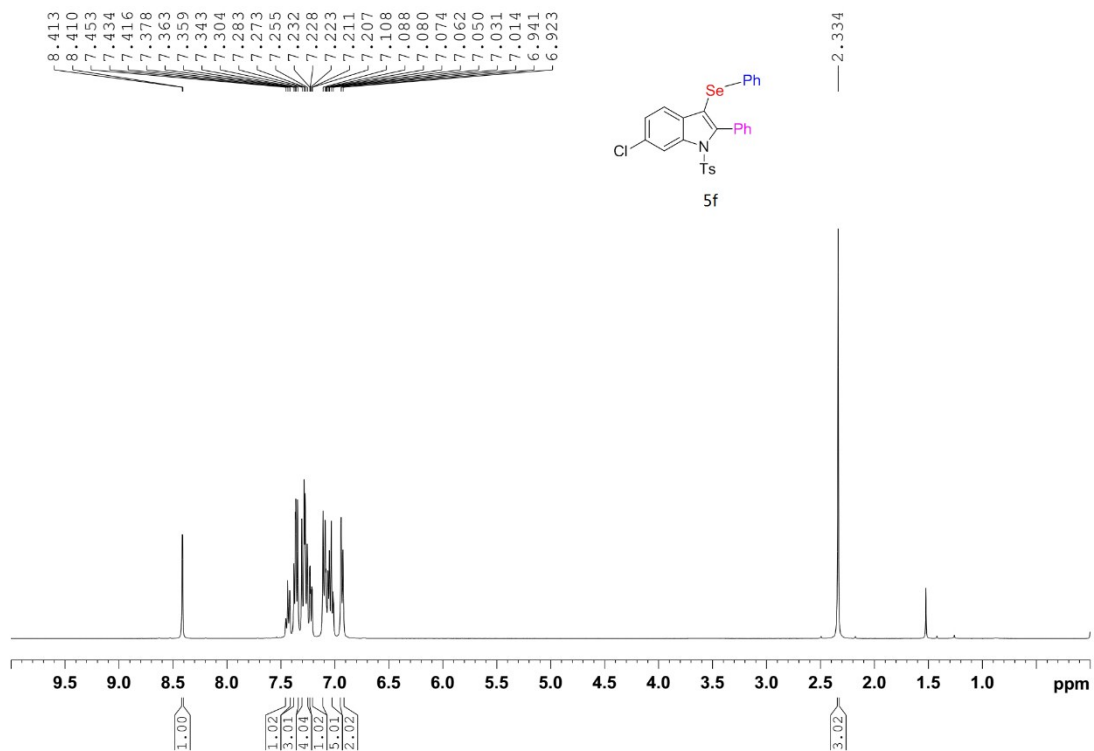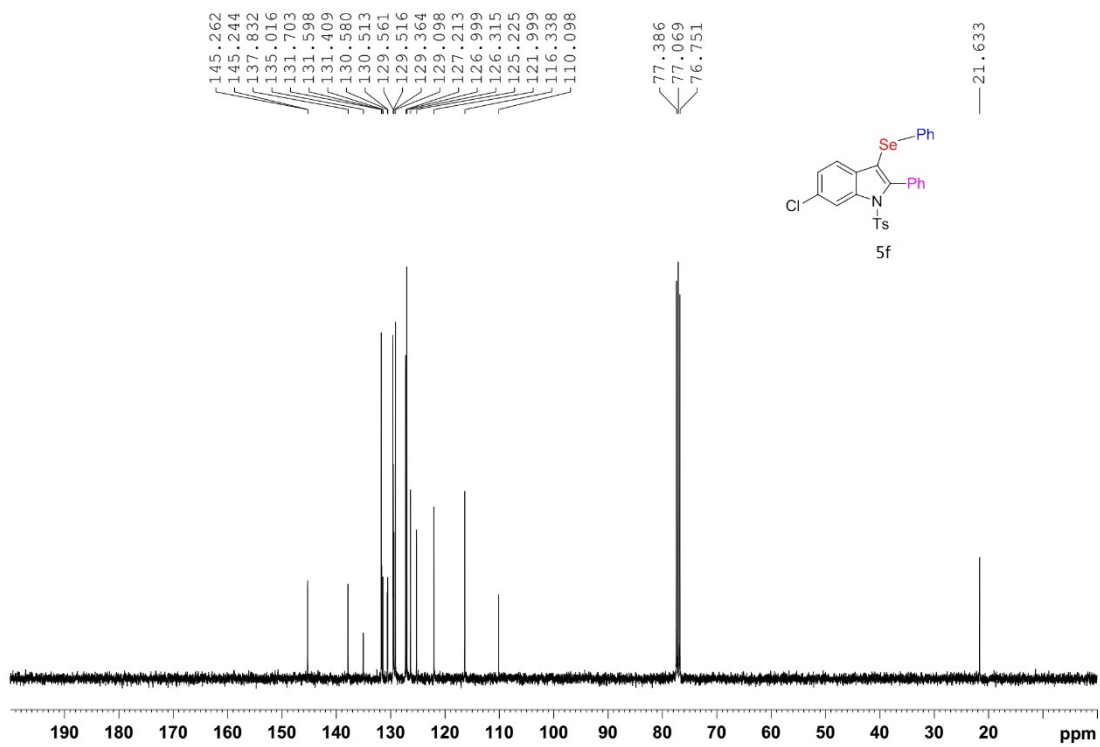

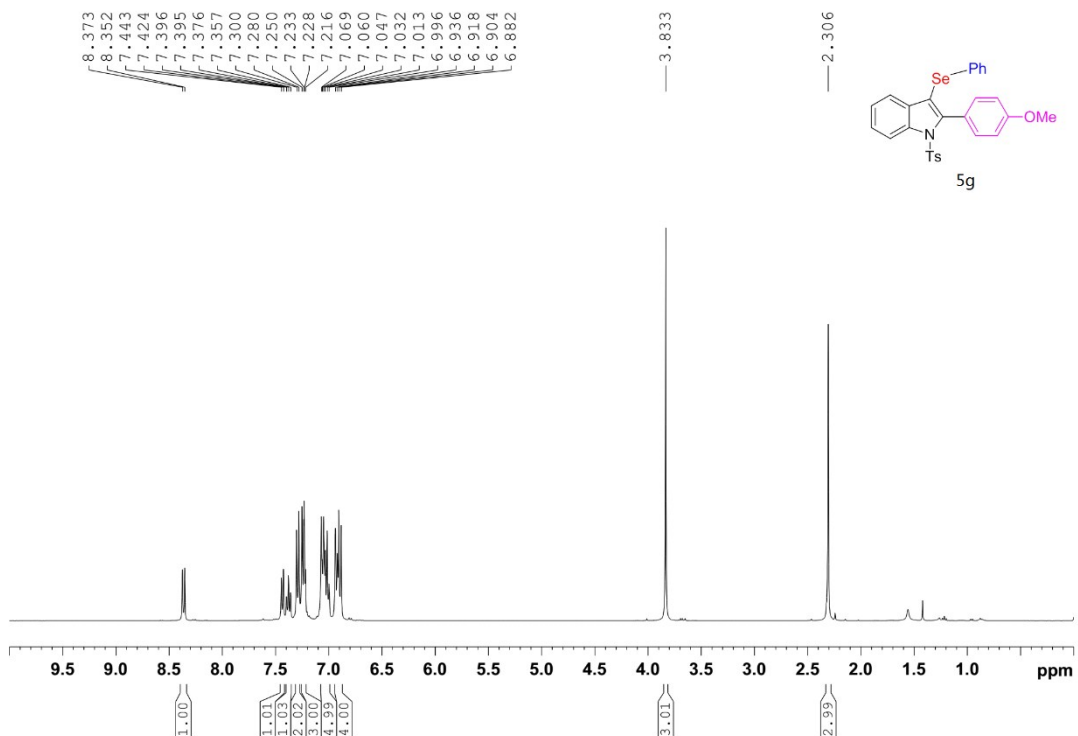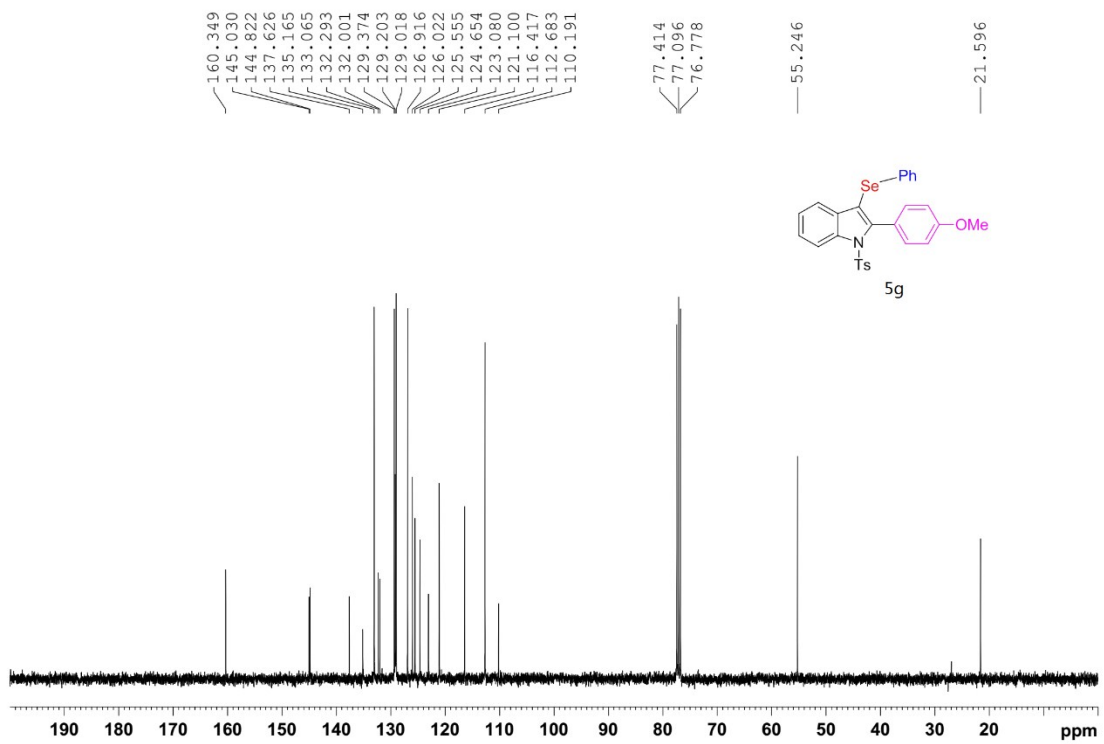

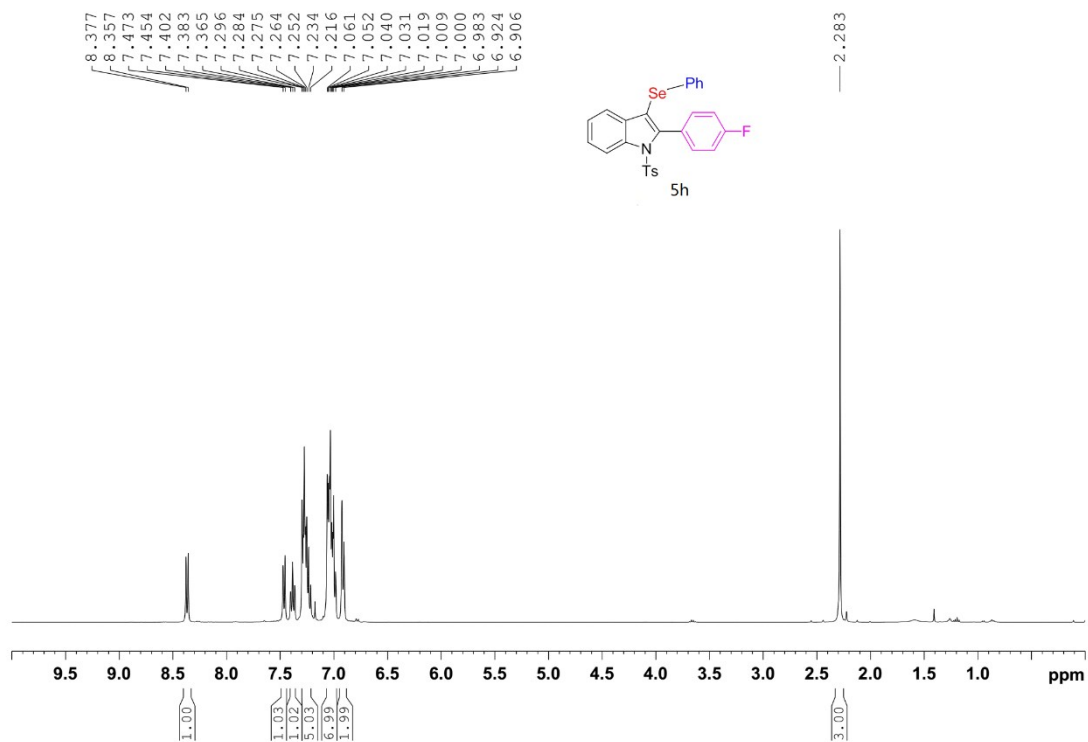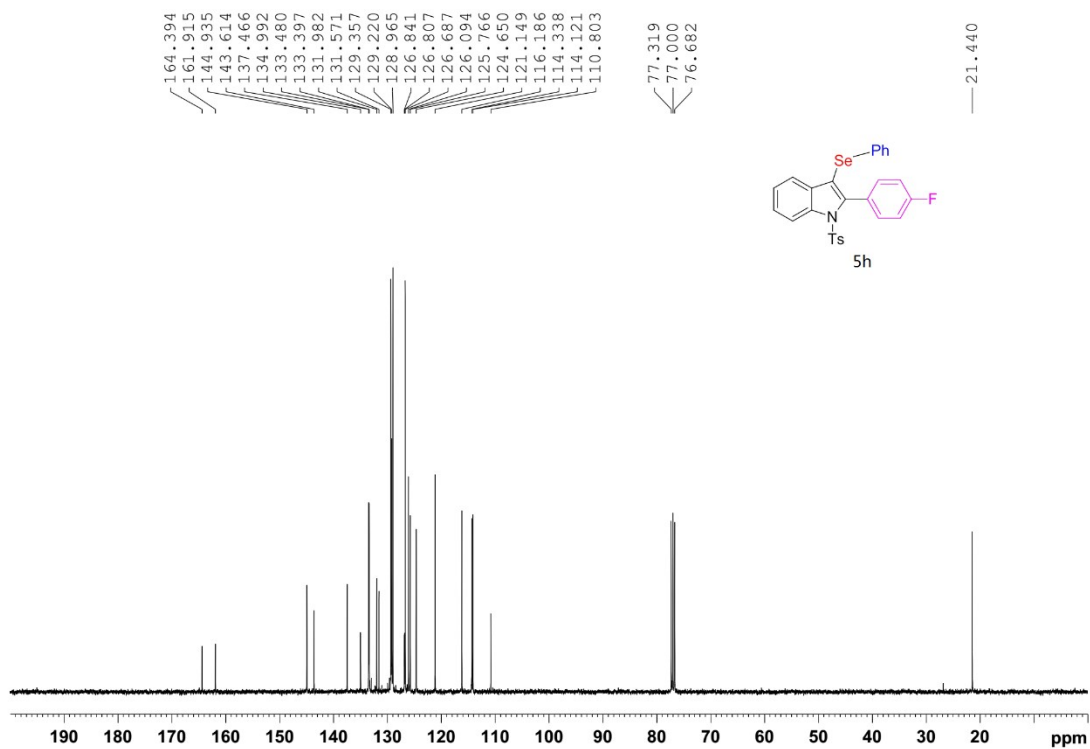

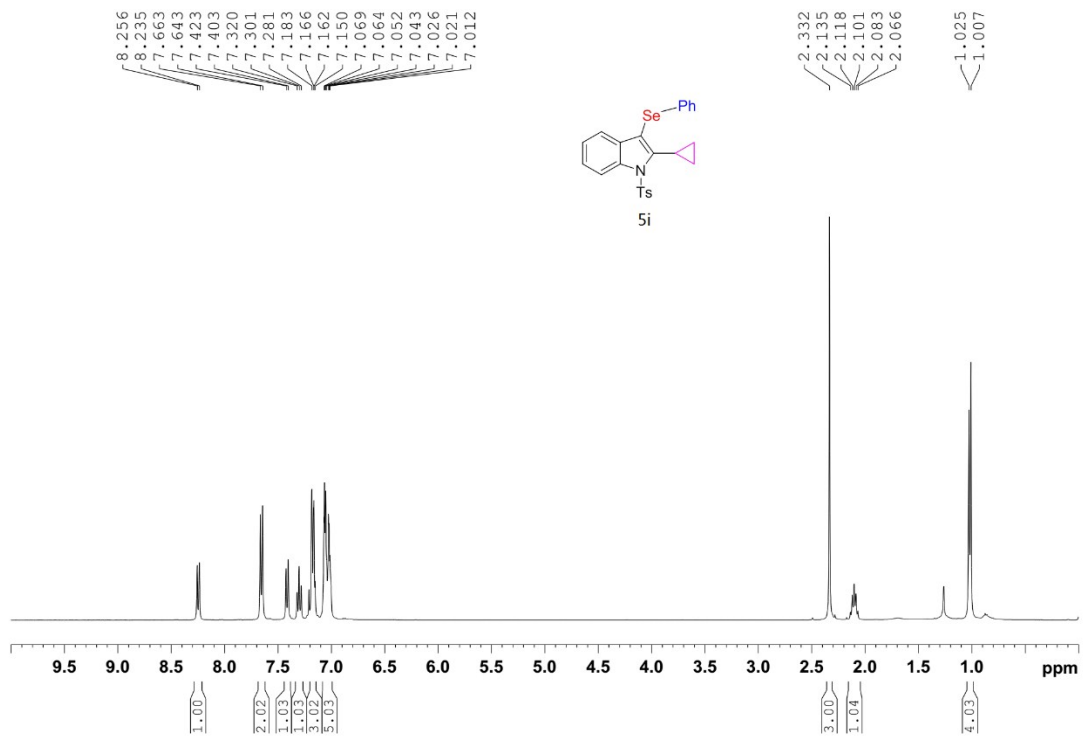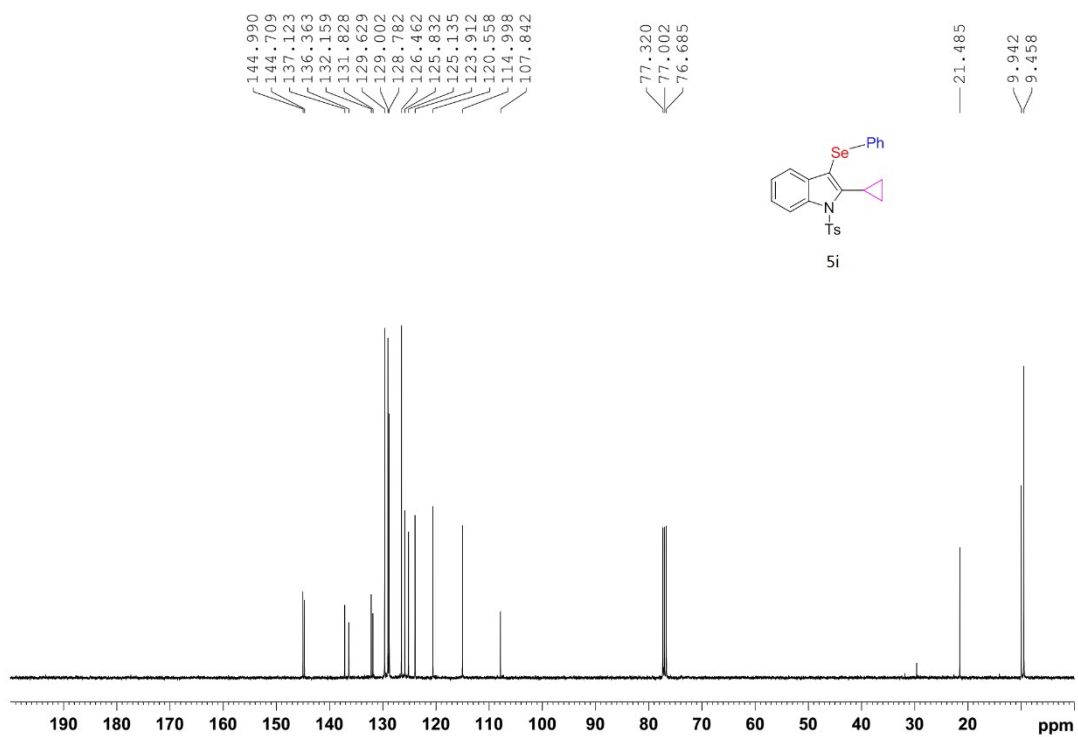

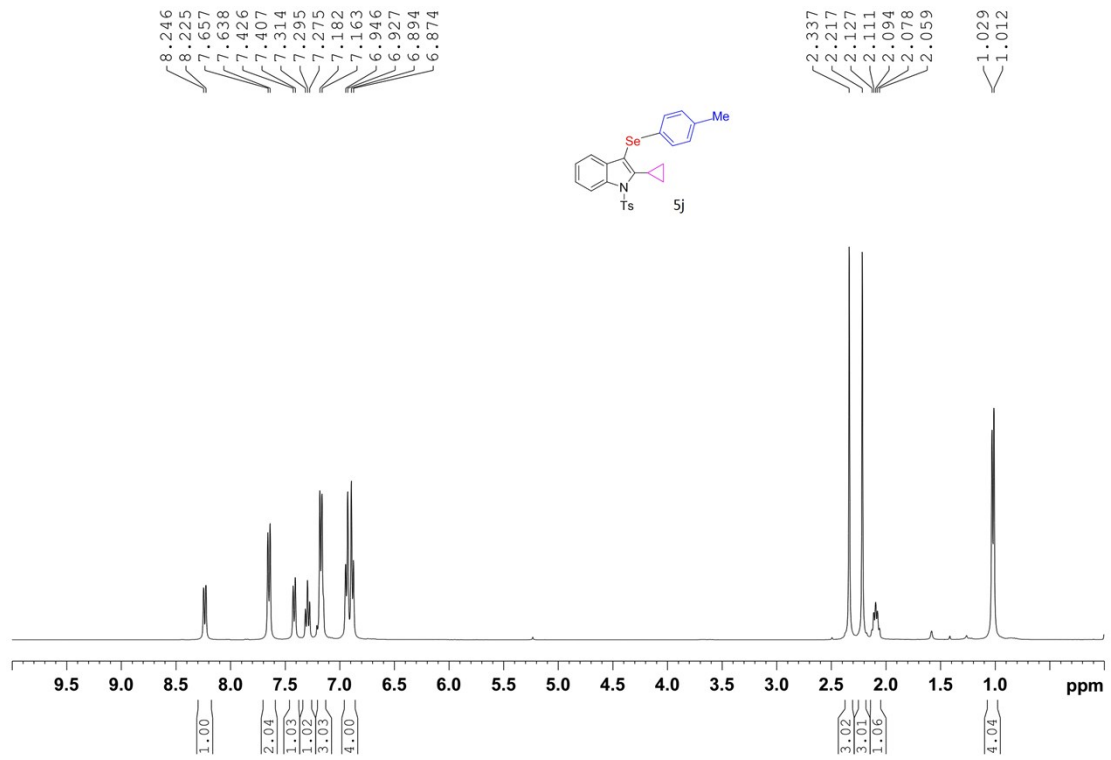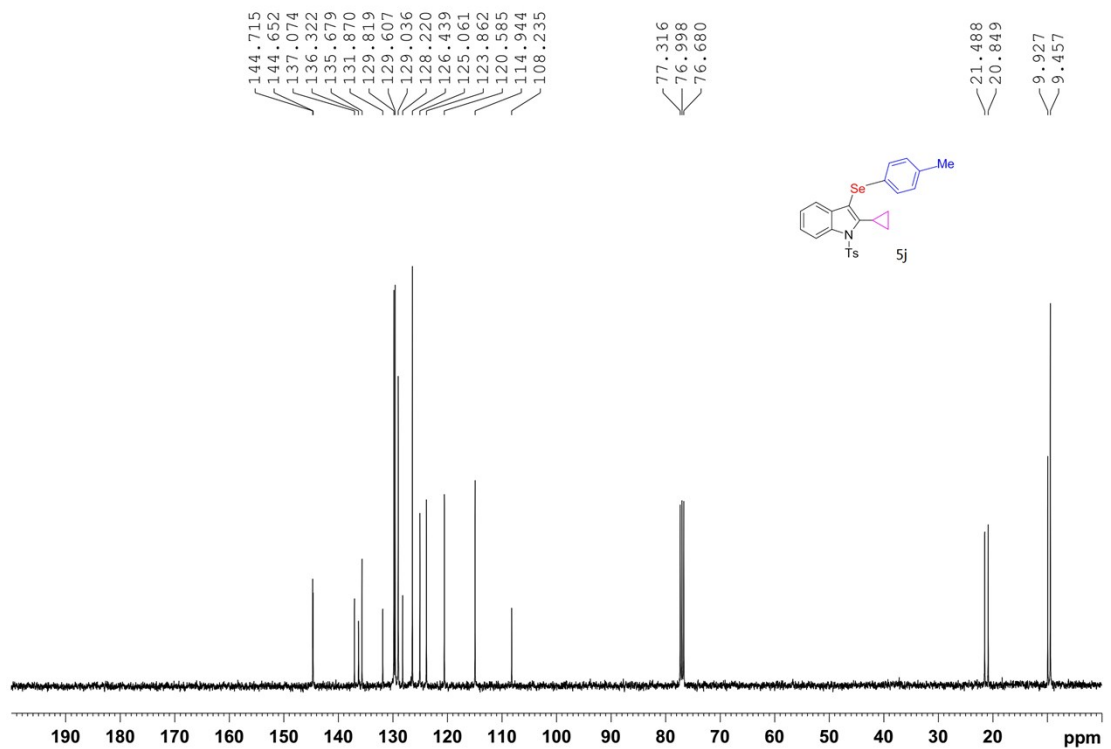

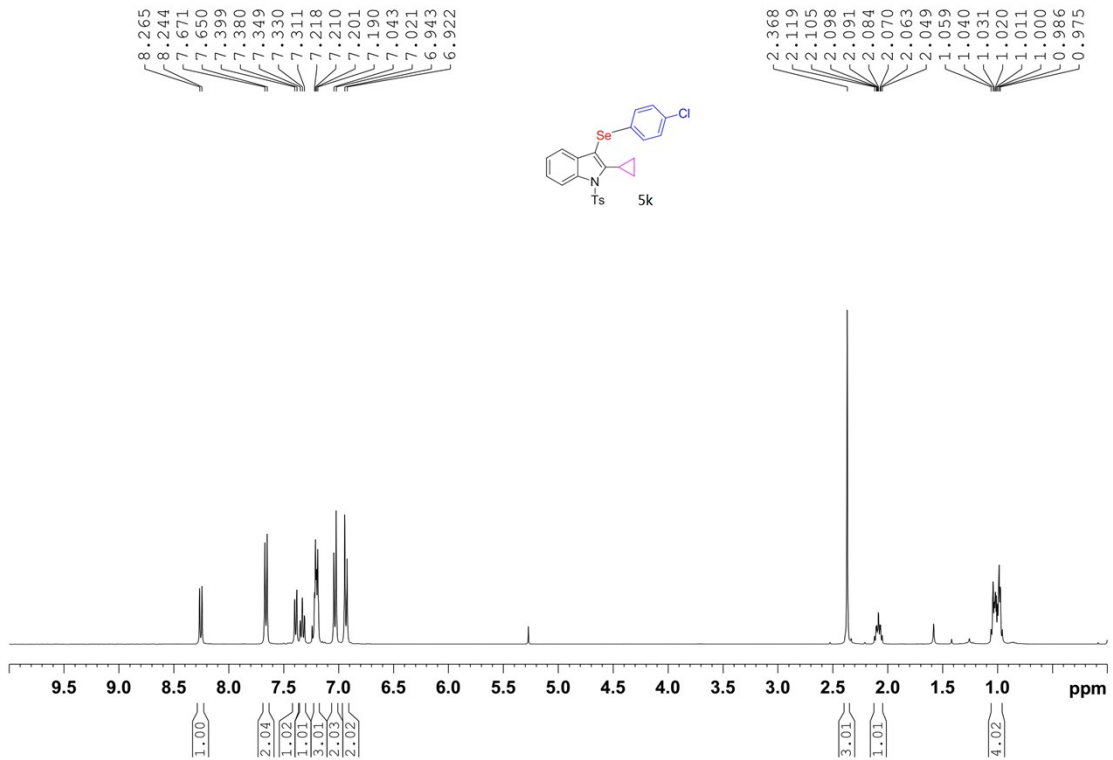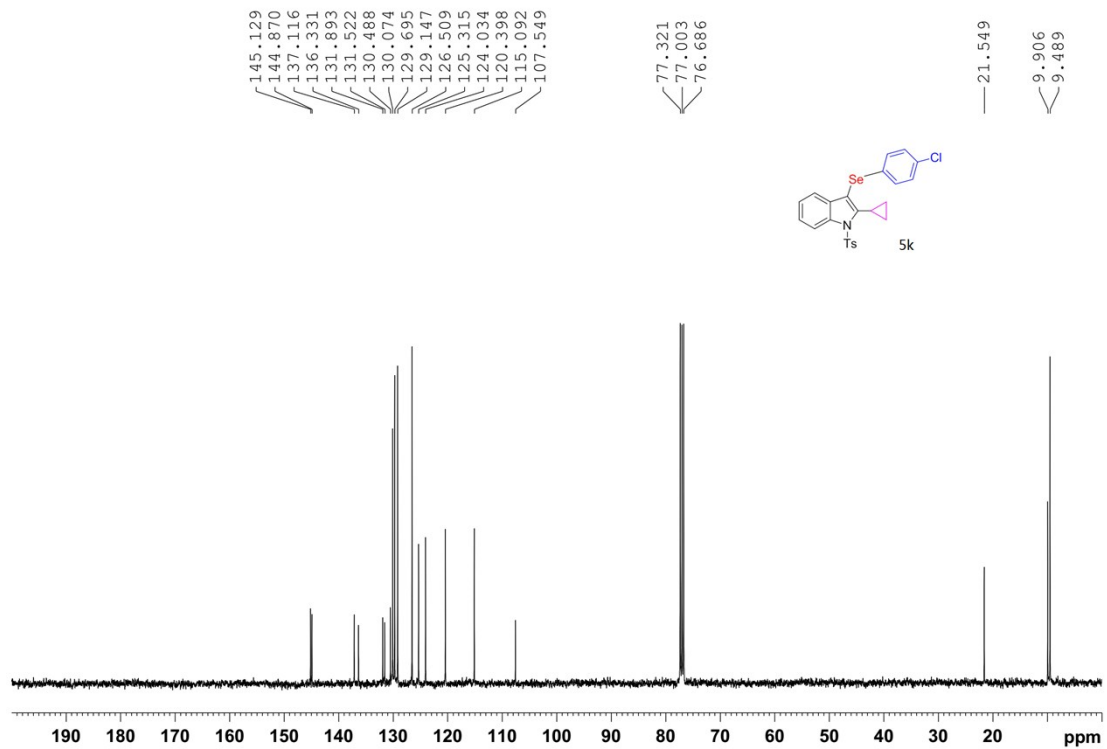



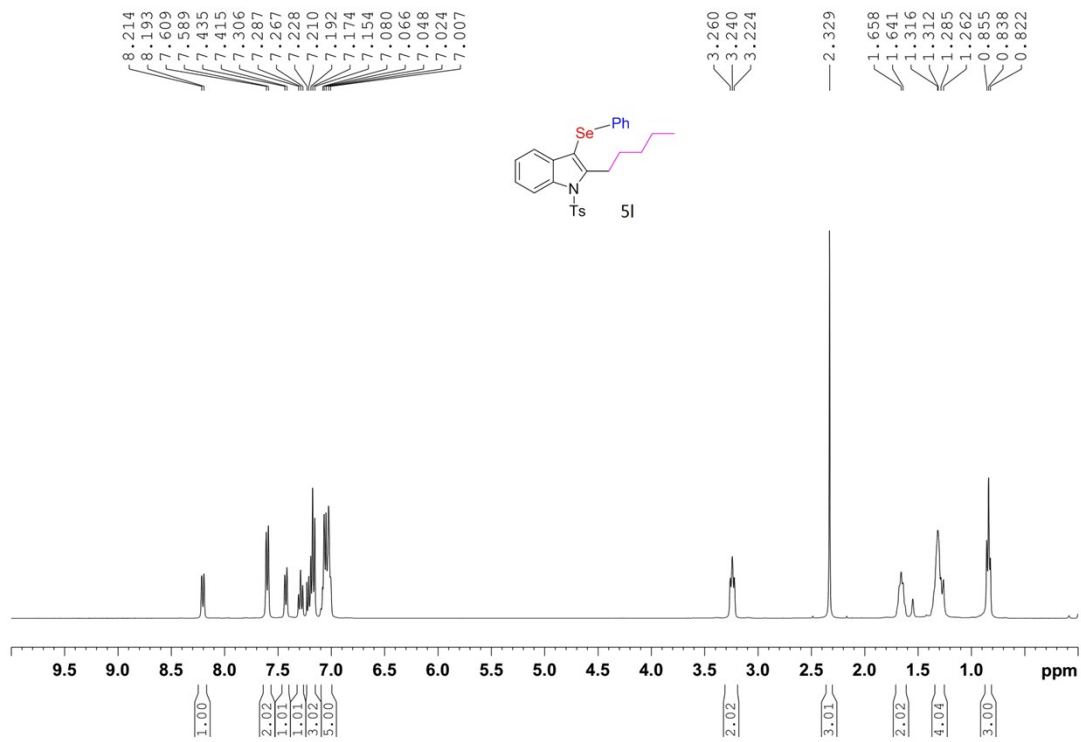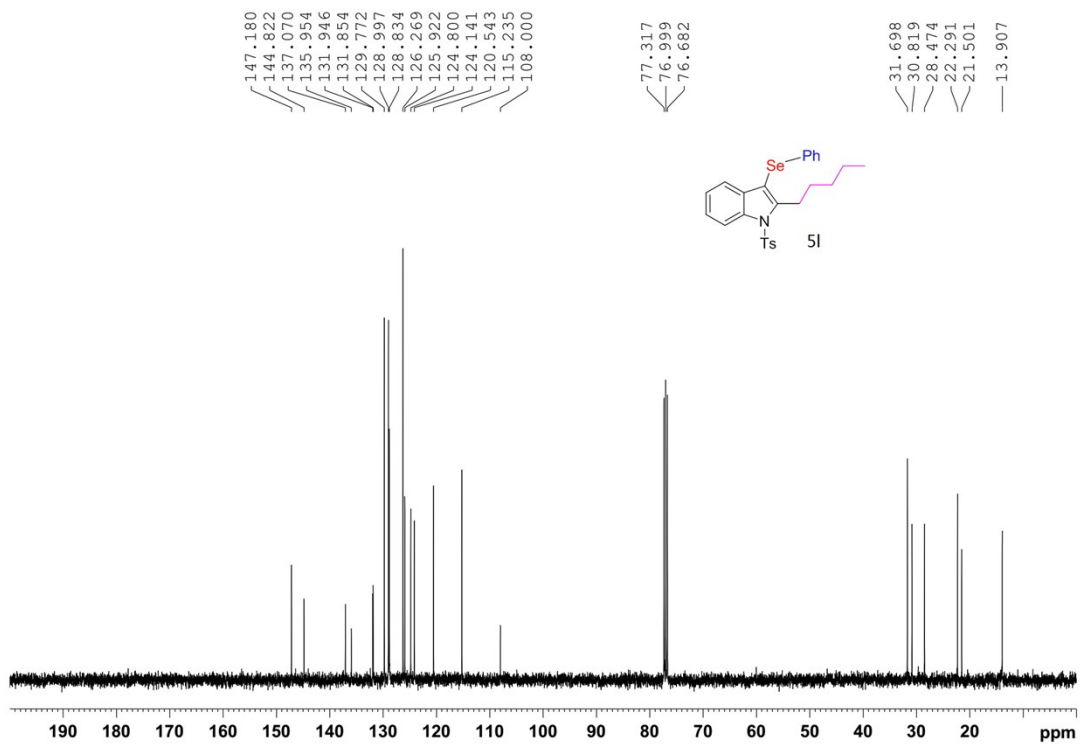

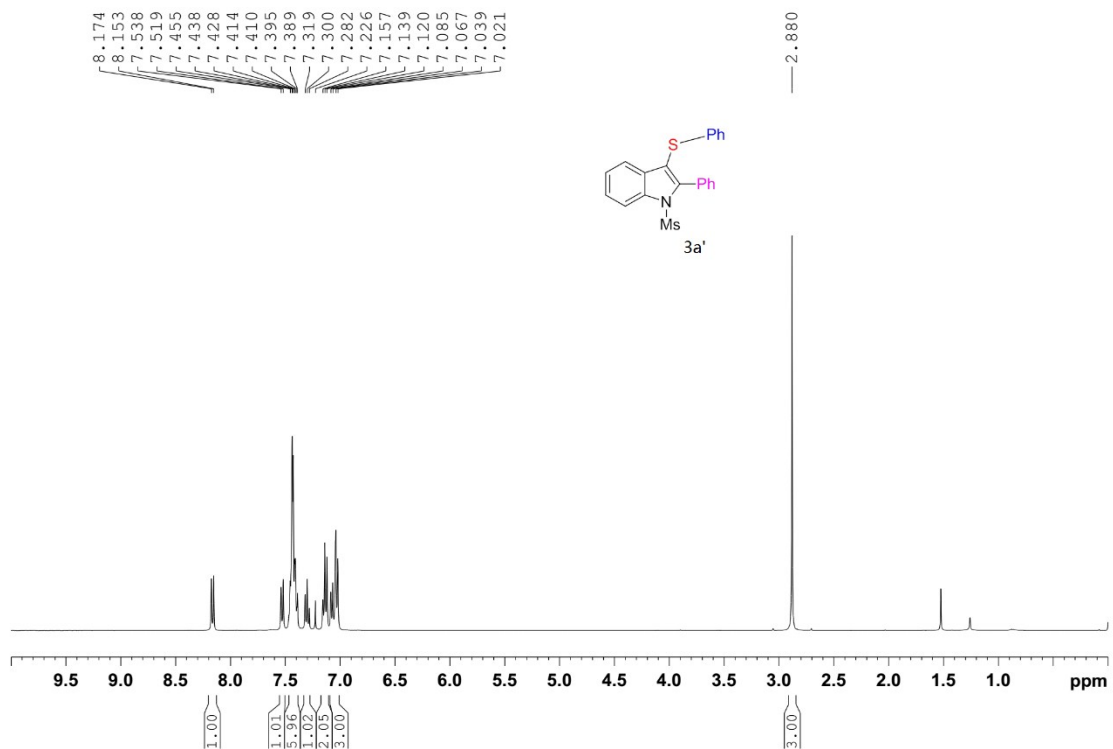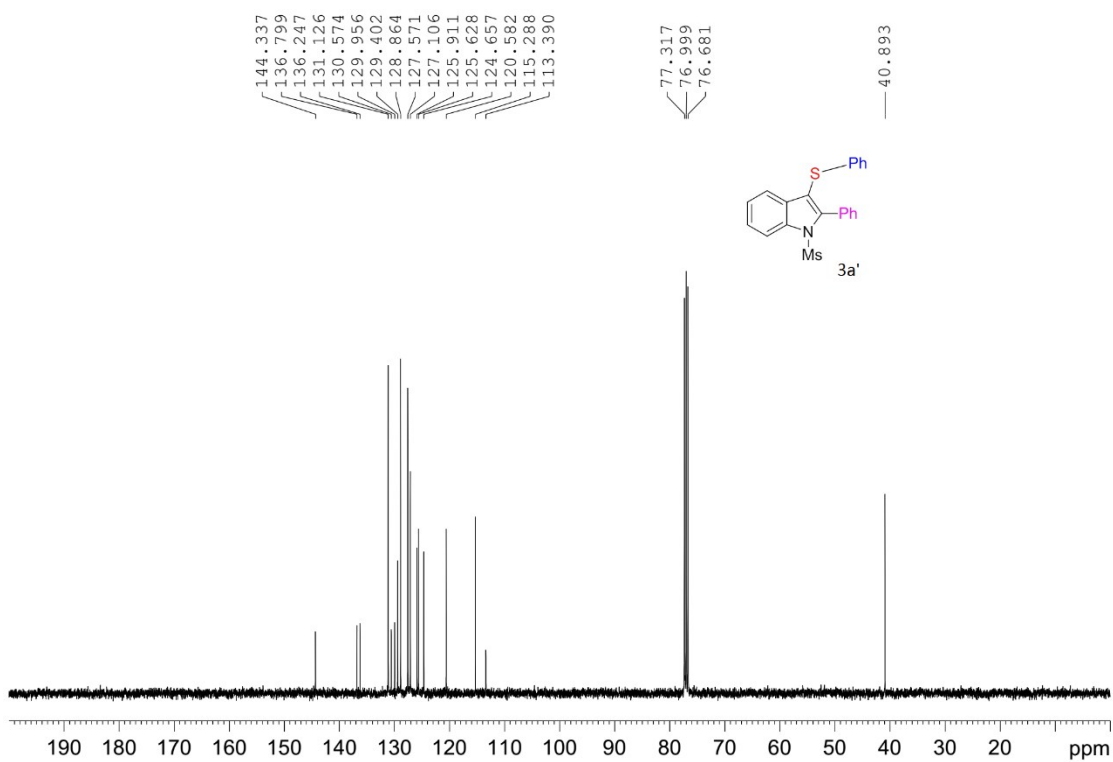

Supplement: c7qo00152e1.pdf [file c7qo00152e1.pdf]
